# Supplementary material
Source: PubMed Central journal article supplement (PMC4892765)
Supplement: hcg-9-119-s001.pdf [file hcg-9-119-s001.pdf]

## **SUPPLEMENTAL MATERIAL.**

### **Supplemental Methods.**

#### **rtPCR**

Total RNA was isolated from adult female flies using a Qiagen RNeasy Mini kit (Qiagen, Manchester, UK) according to the manufacturer's instructions. cDNA was prepared from 1 µg of total DNase-treated RNA by incubating the RNA with Oligo-dT primers at 65°C for 10 min and then placing the reaction on ice for 5 min. Second strand synthesis was performed using Roche Expand RT (Roche Products Limited, Welwyn Garden City, UK). Quantitative PCR was then performed using 10 µL reaction volumes in 384-well format in a Roche LightCycler 480. Intron-spanning primers were used to determine the relative concentration of *Drosophila SPARC* (left, CGACATCGATGAGAACGAAG; right, TCGCGCTCAATATCCTTGAT), using *Actin5C* as a reference control. Quantified data are presented at the mean (+/-SEM) of six independent samples from wild type and *SPARC*-mutant flies.

#### **Imaging the adult heart**

Adults (2-3 week old unless stated otherwise) were anaesthetised with Flynap (Carolina Biological Supply Company, Burlington, NC, USA), dissected and hearts stained as described previously<sup>1,2</sup>. For some experiments, vital dyes were used to identify functional nephrocytes or test their endocytic function (wheat germ agglutinin at 1µg / mL for 15 minutes or 50 µg / mL 10 kDa fluorescently labelled dextran for 0-30 minutes). Semi-intact preparations were then washed three times, fixed for 20 minutes with 1% formaldehyde and co-stained with antibodies (and then the relevant secondary antibodies) or Hoechst to visualise DNA and then imaged.

#### **Epifluorescence microscopy of adult fly tissues**

Semi-intact preparations were washed three times, fixed for 20 minutes with 1% formaldehyde, permeabilised with 0.1% TritonX-100 in phosphate buffered saline and co-stained with phalloidin (to visualise the actin cytoskeleton of the heart) and antibodies to the nephrocyte endocytosis protein Amnionless. To identify the

garland cells Hoechst 33342 was used to visualise DNA (garland cells having a binucleate nuclear morphology and distinct anatomical location at the interface between the oesophagus and paraventriculus). Fluorescence microscopy of flies was performed using a Zeiss LSM780 coupled to Zen image analysis software (Carl Zeiss, Welwyn Garden City, UK). Phase images were captured on a Zeiss Axiolab and images captured with an ORCA-ER CCD camera (Hamamatsu Photonics KK, Japan; Welwyn Garden City, UK) coupled to Openlab 4.1 (Improvision, Coventry, UK). Images were coloured, contrast enhanced and overlaid using Photoshop CS3. All micrographs were collected using the same microscope settings and image alterations, which were limited to contrast and brightness enhancement.

### **References.**

1. Catterson JH, Heck MM, Hartley PS. Fermitins, the orthologs of mammalian kindlins, regulate the development of a functional cardiac syncytium in *Drosophila melanogaster*. *PLoS One*. 2013;8:e62958.
2. Park SK, Venable JD, Xu T, Yates JR. A quantitative analysis software tool for mass spectrometry-based proteomics. *Nature Methods*. 2008;5:319-322.

## Supplemental Figure S1.

SPARC peptide peak areas. Chromatograms for identified SPARC peptides are shown. In each panel the upper two chromatograms show peptide peaks from two technical replicates of a sample from the wild type ( $w^{1118}$ ) hemolymph and the lower two chromatograms correspond to two technical replicates from a sample of the mutant ( $dKlf15^{NN}$ ) hemolymph. In each case the peptide is detected in the mutant but not the wild type hemolymph.

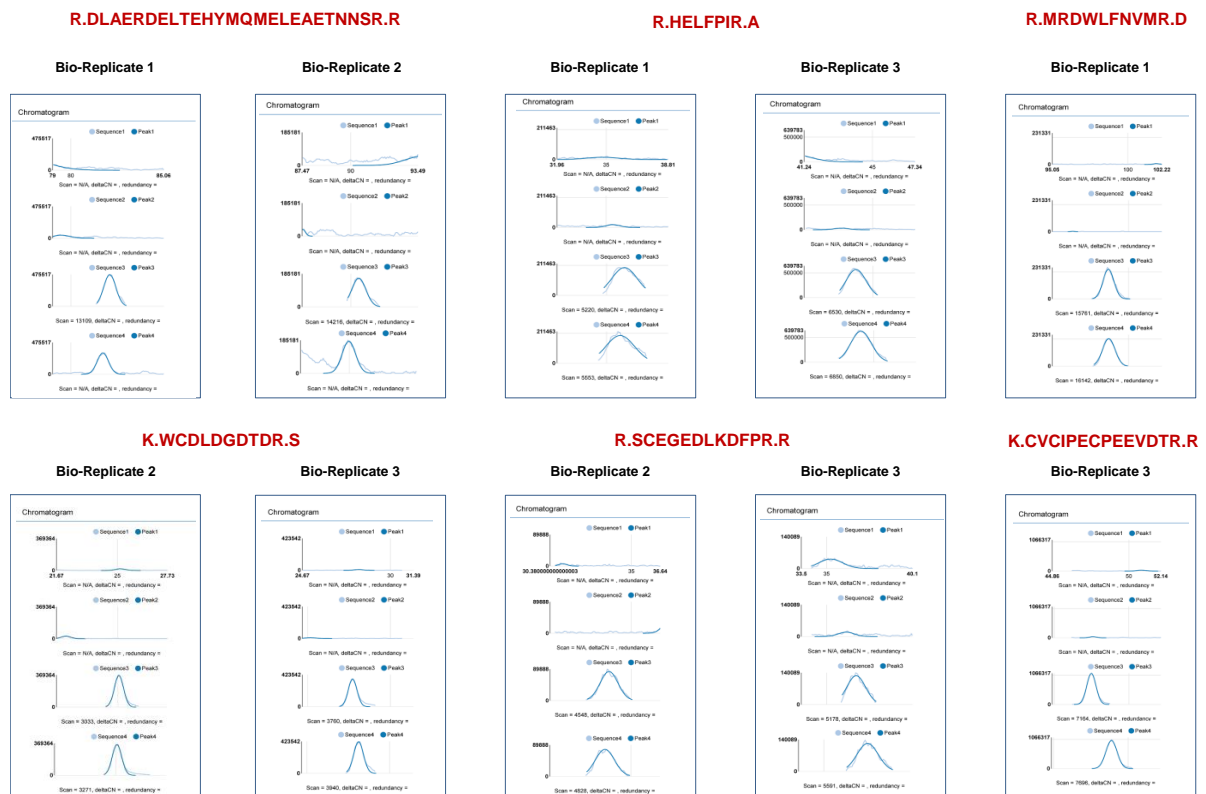

**Supplemental Figure S2.**

Effect of *SPARC* knock-down on heart function.

The function of the adult heart was analysed by high frame rate videomicroscopy (as described in the methods section of the main document). (A) The M-modes show the distance moved by the wall of the heart during a contraction (Fractional Shortening, red arrows). The control heart shows robust contraction between diastole to systole, whereas there is significantly less contraction when *SPARC* is silenced in the cardiomyocytes. (B) The graph shows the relative distance moved by the heart walls during diastole and systole (Fractional Shortening). The knock-down of *SPARC* in cardiomyocytes using the *TinCΔ4* driver (*TinCd4* x *Sparc* TRiP) had a significant impact on fractional shortening that was not seen in either of the control genotypes (*TinCd4* x *w1118* and *w1118* x *Sparc* TRiP).  $n = 19$  to 29 flies per genotype. \* $P < 0.001$ .

**A**

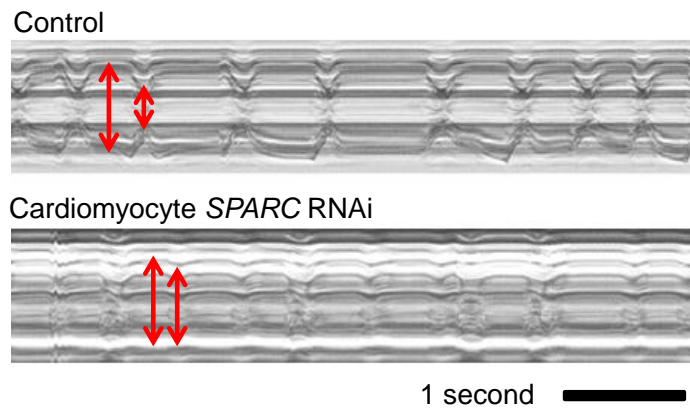

**B**

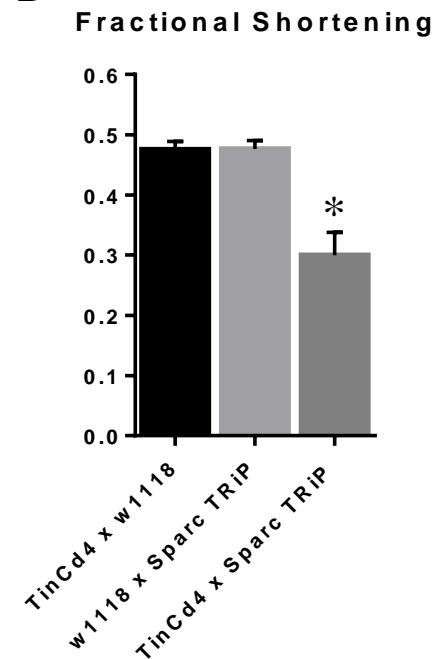

**Supplemental Table. Proteomics Data**

| Group 1:                |            |               | Present in <i>dKlf15<sup>NN</sup></i> mutant but undetected in <i>w<sup>1118</sup></i> control<br>(a mean of two spectral counts or lower was regarded as undetected) |    |    |                 |    |     |              |     |                 |     |        |                |
|-------------------------|------------|---------------|-----------------------------------------------------------------------------------------------------------------------------------------------------------------------|----|----|-----------------|----|-----|--------------|-----|-----------------|-----|--------|----------------|
| Uniprot ID              | Annotation |               | <i>w1118</i>                                                                                                                                                          |    |    | <i>dKlf15NN</i> |    |     | <i>w1118</i> |     | <i>dKlf15NN</i> |     | t-Test | B-I Correction |
|                         |            |               | #1                                                                                                                                                                    | #2 | #3 | #1              | #2 | #3  | Mean         | SEM | Mean            | SEM |        |                |
| tr Q97365 O97365_DROME  | O97365     | BM-40-SPARC   | 0                                                                                                                                                                     | 0  | 0  | 38              | 87 | 126 | 0            | 0   | 83              | 26  | 0.031  | 0.160          |
| sp Q24298 CADE_DROME    | Q24298     | shg           | 0                                                                                                                                                                     | 0  | 0  | 37              | 49 | 62  | 0            | 0   | 49              | 7   | 0.002  | 0.093          |
| tr Q7JR49 Q7JR49_DROME  | Q7JR49     | VhaAC45       | 0                                                                                                                                                                     | 1  | 0  | 22              | 16 | 40  | 0            | 0   | 26              | 7   | 0.023  | 0.143          |
| sp P10981 ACT5_DROME    | P10981     | Act87E        | 0                                                                                                                                                                     | 0  | 0  | 0               | 0  | 72  | 0            | 0   | 24              | 24  | 0.374  | 0.386          |
| tr A8JUV8 A8JUV8_DROME  | A8JUV8     | trol          | 0                                                                                                                                                                     | 0  | 0  | 6               | 16 | 48  | 0            | 0   | 23              | 13  | 0.135  | 0.266          |
| sp O01404 PHM_DROME     | O01404     | Phm           | 0                                                                                                                                                                     | 0  | 0  | 11              | 25 | 32  | 0            | 0   | 23              | 6   | 0.020  | 0.143          |
| sp P33438 GLT_DROME     | P33438     | Glt           | 0                                                                                                                                                                     | 0  | 0  | 6               | 32 | 26  | 0            | 0   | 21              | 8   | 0.057  | 0.216          |
| tr Q9VRS4 Q9VRS4_DROME  | Q9VRS4     | yip7          | 0                                                                                                                                                                     | 1  | 0  | 14              | 21 | 26  | 0            | 0   | 20              | 4   | 0.005  | 0.093          |
| sp Q917U4-1 TITIN_DROME | Q917U4     | sls           | 0                                                                                                                                                                     | 0  | 0  | 14              | 0  | 38  | 0            | 0   | 17              | 11  | 0.197  | 0.327          |
| tr Q9VKG4 Q9VKG4_DROME  | Q9VKG4     | BcDNA_GH07269 | 0                                                                                                                                                                     | 0  | 0  | 3               | 20 | 28  | 0            | 0   | 17              | 7   | 0.080  | 0.266          |
| tr Q9VZQ7 Q9VZQ7_DROME  | Q9VZQ7     | CG14961       | 0                                                                                                                                                                     | 5  | 0  | 18              | 12 | 16  | 2            | 2   | 15              | 2   | 0.006  | 0.093          |
| tr Q9VB76 Q9VB76_DROME  | Q9VB76     | CG6074        | 0                                                                                                                                                                     | 0  | 0  | 3               | 12 | 30  | 0            | 0   | 15              | 8   | 0.129  | 0.266          |
| tr A1ZAP4 A1ZAP4_DROME  | A1ZAP4     | fat-spondin   | 0                                                                                                                                                                     | 0  | 0  | 6               | 15 | 24  | 0            | 0   | 15              | 5   | 0.042  | 0.178          |
| tr Q9VHG4 Q9VHG4_DROME  | Q9VHG4     | VhaM8.9       | 0                                                                                                                                                                     | 0  | 0  | 9               | 8  | 28  | 0            | 0   | 15              | 7   | 0.084  | 0.266          |
| sp P04814 TRYA_DROME    | P04814     | alphaTry      | 0                                                                                                                                                                     | 0  | 0  | 13              | 21 | 10  | 0            | 0   | 15              | 3   | 0.012  | 0.140          |
| sp P10987 ACT1_DROME    | P10987     | Act5C         | 0                                                                                                                                                                     | 0  | 0  | 43              | 0  | 0   | 0            | 0   | 14              | 14  | 0.374  | 0.386          |
| tr A1ZB62 A1ZB62_DROME  | A1ZB62     | CG16836       | 0                                                                                                                                                                     | 0  | 0  | 0               | 16 | 24  | 0            | 0   | 13              | 7   | 0.132  | 0.266          |
| tr Q810D4 Q810D4_DROME  | Q810D4     | CG9297        | 0                                                                                                                                                                     | 0  | 0  | 17              | 7  | 16  | 0            | 0   | 13              | 3   | 0.016  | 0.143          |
| sp Q24114 DALY_DROME    | Q24114     | dally         | 0                                                                                                                                                                     | 0  | 0  | 9               | 9  | 20  | 0            | 0   | 13              | 4   | 0.025  | 0.145          |
| sp P42787-1 CBPD_DROME  | P42787     | svr           | 0                                                                                                                                                                     | 0  | 0  | 3               | 12 | 22  | 0            | 0   | 12              | 5   | 0.084  | 0.266          |
| tr Q7JX94 Q7JX94_DROME  | Q7JX94     | CG30503       | 0                                                                                                                                                                     | 0  | 0  | 4               | 16 | 16  | 0            | 0   | 12              | 4   | 0.040  | 0.177          |
| sp Q9W1V6 PRPD3_DROME   | Q9W1V6     | Dox-A3        | 0                                                                                                                                                                     | 0  | 0  | 0               | 17 | 18  | 0            | 0   | 12              | 6   | 0.116  | 0.266          |
| tr A1Z910 A1Z910_DROME  | A1Z910     | CG6357        | 0                                                                                                                                                                     | 0  | 0  | 5               | 12 | 18  | 0            | 0   | 12              | 4   | 0.038  | 0.177          |
| sp P10674-1 FAS1_DROME  | P10674     | Fas1          | 1                                                                                                                                                                     | 0  | 0  | 6               | 17 | 10  | 0            | 0   | 11              | 3   | 0.027  | 0.148          |
| tr Q8IMH5 Q8IMH5_DROME  | Q8IMH5     | Npe2h         | 0                                                                                                                                                                     | 0  | 0  | 0               | 15 | 18  | 0            | 0   | 11              | 6   | 0.120  | 0.266          |
| sp P29413 CALR_DROME    | P29413     | Crc           | 0                                                                                                                                                                     | 0  | 0  | 6               | 11 | 16  | 0            | 0   | 11              | 3   | 0.023  | 0.143          |
| tr Q8IQB8 Q8IQB8_DROME  | Q8IQB8     | Tequila       | 0                                                                                                                                                                     | 0  | 0  | 5               | 19 | 8   | 0            | 0   | 10              | 4   | 0.067  | 0.240          |
| tr Q9VRS7 Q9VRS7_DROME  | Q9VRS7     | Jon65Aiii     | 0                                                                                                                                                                     | 0  | 0  | 6               | 11 | 14  | 0            | 0   | 10              | 2   | 0.014  | 0.143          |
| sp Q9V498 CSTN1_DROME   | Q9V498     | caIs          | 0                                                                                                                                                                     | 0  | 0  | 5               | 9  | 16  | 0            | 0   | 10              | 3   | 0.037  | 0.177          |
| sp Q9VN93-1 CPR1_DROME  | Q9VN93     | CG12163       | 0                                                                                                                                                                     | 0  | 0  | 2               | 13 | 14  | 0            | 0   | 10              | 4   | 0.058  | 0.216          |
| tr Q9VMJ5 Q9VMJ5_DROME  | Q9VMJ5     | Gal           | 0                                                                                                                                                                     | 0  | 0  | 10              | 5  | 12  | 0            | 0   | 9               | 2   | 0.010  | 0.133          |
| sp Q77150 IM02_DROME    | Q77150     | IM2           | 0                                                                                                                                                                     | 0  | 0  | 0               | 0  | 26  | 0            | 0   | 9               | 9   | 0.374  | 0.386          |
| tr Q8MKJ5 Q8MKJ5_DROME  | Q8MKJ5     | CG30197       | 0                                                                                                                                                                     | 0  | 0  | 0               | 7  | 18  | 0            | 0   | 8               | 5   | 0.193  | 0.326          |
| tr Q8ING0 Q8ING0_DROME  | Q8ING0     | CG31326       | 0                                                                                                                                                                     | 4  | 0  | 6               | 19 | 0   | 1            | 1   | 8               | 6   | 0.301  | 0.386          |
| tr Q9VIQ5 Q9VIQ5_DROME  | Q9VIQ5     | CG10680       | 0                                                                                                                                                                     | 0  | 0  | 3               | 7  | 12  | 0            | 0   | 7               | 3   | 0.046  | 0.186          |
| tr Q7JYV3 Q7JYV3_DROME  | Q7JYV3     | CG12374       | 0                                                                                                                                                                     | 0  | 0  | 0               | 9  | 12  | 0            | 0   | 7               | 4   | 0.122  | 0.266          |
| tr Q8IRD6 Q8IRD6_DROME  | Q8IRD6     | Drs14         | 0                                                                                                                                                                     | 0  | 2  | 0               | 5  | 16  | 1            | 1   | 7               | 5   | 0.246  | 0.369          |
| sp P13709-1 FSH_DROME   | P13709     | fs(1)b        | 0                                                                                                                                                                     | 0  | 0  | 21              | 0  | 0   | 0            | 0   | 7               | 7   | 0.374  | 0.386          |
| tr B7Z0T0 B7Z0T0_DROME  | B7Z0T0     | MP1           | 0                                                                                                                                                                     | 4  | 0  | 0               | 7  | 14  | 1            | 1   | 7               | 4   | 0.262  | 0.381          |
| tr Q9VJU6 Q9VJU6_DROME  | Q9VJU6     | NimB5         | 0                                                                                                                                                                     | 0  | 0  | 0               | 3  | 18  | 0            | 0   | 7               | 6   | 0.287  | 0.386          |
| tr Q9VN71 Q9VN71_DROME  | Q9VN71     | CG14661       | 0                                                                                                                                                                     | 0  | 0  | 5               | 7  | 8   | 0            | 0   | 6               | 1   | 0.002  | 0.093          |
| tr Q8SYQ4 Q8SYQ4_DROME  | Q8SYQ4     | CG31997       | 0                                                                                                                                                                     | 3  | 0  | 6               | 1  | 12  | 1            | 1   | 6               | 3   | 0.168  | 0.298          |
| tr Q9VZ66 Q9VZ66_DROME  | Q9VZ66     | CG15209       | 0                                                                                                                                                                     | 0  | 0  | 0               | 11 | 8   | 0            | 0   | 6               | 3   | 0.124  | 0.266          |
| tr A1Z7M8 A1Z7M8_DROME  | A1Z7M8     | Ance-4        | 0                                                                                                                                                                     | 0  | 0  | 6               | 8  | 4   | 0            | 0   | 6               | 1   | 0.006  | 0.093          |
| sp Q95029-1 CATL_DROME  | Q95029     | Cp1           | 0                                                                                                                                                                     | 0  | 0  | 0               | 7  | 10  | 0            | 0   | 6               | 3   | 0.132  | 0.266          |
| tr Q9VGK3 Q9VGK3_DROME  | Q9VGK3     | CG14715       | 0                                                                                                                                                                     | 0  | 0  | 3               | 5  | 8   | 0            | 0   | 6               | 1   | 0.017  | 0.143          |
| tr Q9VRT2 Q9VRT2_DROME  | Q9VRT2     | CG10472       | 0                                                                                                                                                                     | 0  | 0  | 0               | 4  | 12  | 0            | 0   | 5               | 4   | 0.205  | 0.334          |
| sp Q9VB11 UNC80_DROME   | Q9VB11     | CG18437       | 0                                                                                                                                                                     | 0  | 0  | 0               | 0  | 16  | 0            | 0   | 5               | 5   | 0.374  | 0.386          |
| sp Q9VW71 FAT2_DROME    | Q9VW71     | kug           | 0                                                                                                                                                                     | 0  | 0  | 0               | 0  | 16  | 0            | 0   | 5               | 5   | 0.374  | 0.386          |
| tr Q9VEP8 Q9VEP8_DROME  | Q9VEP8     | Irc           | 0                                                                                                                                                                     | 0  | 0  | 2               | 4  | 10  | 0            | 0   | 5               | 2   | 0.106  | 0.266          |
| tr Q86P15 Q86P15_DROME  | Q86P15     | lhl           | 0                                                                                                                                                                     | 0  | 0  | 5               | 11 | 0   | 0            | 0   | 5               | 3   | 0.170  | 0.298          |
| tr Q7JY07 Q7JY07_DROME  | Q7JY07     | CG9010        | 0                                                                                                                                                                     | 0  | 0  | 14              | 0  | 0   | 0            | 0   | 5               | 5   | 0.374  | 0.386          |
| tr Q9VAQ4 Q9VAQ4_DROME  | Q9VAQ4     | CG11841       | 0                                                                                                                                                                     | 5  | 0  | 1               | 5  | 8   | 2            | 2   | 5               | 2   | 0.347  | 0.386          |
| tr Q24485 Q24485_DROME  | Q24485     | RNaseX25      | 0                                                                                                                                                                     | 0  | 0  | 0               | 4  | 10  | 0            | 0   | 5               | 3   | 0.184  | 0.317          |
| sp Q9NB71 HIW_DROME     | Q9NB71     | hiw           | 0                                                                                                                                                                     | 0  | 0  | 0               | 0  | 14  | 0            | 0   | 5               | 5   | 0.374  | 0.386          |
| tr Q9VAY0 Q9VAY0_DROME  | Q9VAY0     | CG5527        | 0                                                                                                                                                                     | 3  | 0  | 3               | 3  | 8   | 1            | 1   | 5               | 2   | 0.123  | 0.266          |
| tr A8DY49 A8DY49_DROME  | A8DY49     | CG34215       | 0                                                                                                                                                                     | 0  | 0  | 0               | 3  | 10  | 0            | 0   | 4               | 3   | 0.231  | 0.358          |
| tr Q7JV39 Q7JV39_DROME  | Q7JV39     | CG11400       | 0                                                                                                                                                                     | 0  | 0  | 2               | 3  | 8   | 0            | 0   | 4               | 2   | 0.108  | 0.266          |
| tr Q9VQT6 Q9VQT6_DROME  | Q9VQT6     | CG3513        | 4                                                                                                                                                                     | 0  | 0  | 0               | 4  | 8   | 1            | 1   | 4               | 2   | 0.353  | 0.386          |
| tr Q7KTA1 Q7KTA1_DROME  | Q7KTA1     | NimB2         | 0                                                                                                                                                                     | 0  | 0  | 0               | 0  | 12  | 0            | 0   | 4               | 4   | 0.374  | 0.386          |
| tr Q9Y136 Q9Y136_DROME  | Q9Y136     | CG14526       | 0                                                                                                                                                                     | 4  | 0  | 2               | 9  | 0   | 1            | 1   | 4               | 3   | 0.452  | 0.457          |
| tr Q9W2F1 Q9W2F1_DROME  | Q9W2F1     | CG15674       | 0                                                                                                                                                                     | 0  | 0  | 6               | 4  | 2   | 0            | 0   | 4               | 1   | 0.021  | 0.143          |
| tr Q9VGE7 Q9VGE7_DROME  | Q9VGE7     | Ect3          | 0                                                                                                                                                                     | 0  | 0  | 6               | 0  | 6   | 0            | 0   | 4               | 2   | 0.117  | 0.266          |
| tr A1Z876 A1Z876_DROME  | A1Z876     | Ndg           | 0                                                                                                                                                                     | 0  | 0  | 5               | 7  | 0   | 0            | 0   | 4               | 2   | 0.127  | 0.266          |
| tr Q5BI82 Q5BI82_DROME  | Q5BI82     | CG13023       | 0                                                                                                                                                                     | 0  | 0  | 5               | 0  | 6   | 0            | 0   | 4               | 2   | 0.121  | 0.266          |
| tr Q9VIQ4 Q9VIQ4_DROME  | Q9VIQ4     | Hf            | 0                                                                                                                                                                     | 4  | 0  | 5               | 0  | 6   | 1            | 1   | 4               | 2   | 0.374  | 0.386          |
| tr Q8IIA8 Q8IIA8_DROME  | Q8IIA8     | CG8273        | 0                                                                                                                                                                     | 0  | 0  | 4               | 7  | 0   | 0            | 0   | 4               | 2   | 0.140  | 0.266          |
| tr Q9VFN7 Q9VFN7_DROME  | Q9VFN7     | Npe2b         | 0                                                                                                                                                                     | 0  | 0  | 2               | 4  | 4   | 0            | 0   | 3               | 1   | 0.003  | 0.093          |
| tr A1Z6H6 A1Z6H6_DROME  | A1Z6H6     | CG7791        | 0                                                                                                                                                                     | 0  | 0  | 0               | 0  | 10  | 0            | 0   | 3               | 3   | 0.374  | 0.386          |
| tr Q8MMD2 Q8MMD2_DROME  | Q8MMD2     | Eps-15        | 0                                                                                                                                                                     | 0  | 0  | 0               | 0  | 10  | 0            | 0   | 3               | 3   | 0.374  | 0.386          |
| tr Q9W1H6 Q9W1H6_DROME  | Q9W1H6     | CG5597        | 0                                                                                                                                                                     | 4  | 0  | 0               | 4  | 6   | 1            | 1   | 3               | 2   | 0.417  | 0.426          |
| tr Q7K088 Q7K088_DROME  | Q7K088     | Obp56e        | 0                                                                                                                                                                     | 3  | 0  | 10              | 0  | 0   | 1            | 1   | 3               | 3   | 0.525  | 0.525          |
| tr Q23995 Q23995_DROME  | Q23995     | tok           | 0                                                                                                                                                                     | 0  | 0  | 0               | 1  | 8   | 0            | 0   | 3               | 2   | 0.277  | 0.386          |
| sp P33450 FAT_DROME     | P33450     | ft            | 0                                                                                                                                                                     | 0  | 0  | 0               | 9  | 0   | 0            | 0   | 3               | 3   | 0.374  | 0.386          |
| tr A8JR58 A8JR58_DROME  | A8JR58     | CG5630        | 0                                                                                                                                                                     | 0  | 0  | 0               | 9  | 0   | 0            | 0   | 3               | 3   | 0.374  | 0.386          |
| sp Q9VEG6 PERC_DROME    | Q9VEG6     | Pxt           | 0                                                                                                                                                                     | 0  | 0  | 4               | 5  | 0   | 0            | 0   | 3               | 2   | 0.124  | 0.266          |
| tr Q9SRA9 Q9SRA9_DROME  | Q9SRA9     | CG9796        | 0                                                                                                                                                                     | 0  | 0  | 3               | 0  | 6   | 0            | 0   | 3               | 2   | 0.152  | 0.283          |
| tr Q9W314 Q9W314_DROME  | Q9W314     | Ser7          | 0                                                                                                                                                                     | 0  | 0  | 2               | 7  | 0   | 0            | 0   | 3               | 2   | 0.242  | 0.369          |
| tr Q0E8P5 Q0E8P5_DROME  | Q0E8P5     | CG5758-RC     | 0                                                                                                                                                                     | 0  | 0  | 4               | 4  | 0   | 0            | 0   | 3               | 1   | 0.116  | 0.266          |
| tr Q9VV46 Q9VV46_DROME  | Q9VV46     | Cpr72Ec       | 0                                                                                                                                                                     | 0  | 0  | 0               | 0  | 4   | 0            | 0   | 3               | 1   | 0.116  | 0.266          |
| tr Q9SSC0 Q9SSC0_DROME  | Q9SSC0     | CG9917-RA     | 0                                                                                                                                                                     | 0  | 0  | 0               | 8  | 0   | 0            | 0   | 3               | 3   | 0.374  | 0.386          |
| tr Q9VQ27 Q9VQ27_DROME  | Q9VQ27     | CG14352       | 0                                                                                                                                                                     | 0  | 0  | 0               | 8  | 0   | 0            | 0   | 3               | 3   | 0.374  | 0.386          |
| tr E1J159 E1J159_DROME  | E1J159     | siz           | 0                                                                                                                                                                     | 0  | 0  | 0               | 0  | 8   | 0            | 0   | 3               | 3   | 0.374  | 0.386          |
| tr Q07273 Q07273_DROME  | Q07273     | EG-66A1.2     | 0                                                                                                                                                                     | 0  | 0  | 0               | 0  | 8   | 0            | 0   | 3               | 3   | 0.374  | 0.386          |
| tr Q9VED8 Q9VED8_DROME  | Q9VED8     | DNaseII       | 0                                                                                                                                                                     | 0  | 0  | 0               | 0  | 8   | 0            | 0   | 3               | 3   | 0.374  | 0.386          |
| tr Q9VW17 Q9VW17_DROME  | Q9VW17     | CG15043       | 0                                                                                                                                                                     | 0  | 0  | 2               | 5  | 0   | 0            | 0   | 3               | 2   | 0.170  | 0.298          |
| sp Q0KHY3-1 Y1004_DROME | Q0KHY3-1   | mesh          | 0                                                                                                                                                                     | 0  | 0  | 0               | 1  | 6   | 0            | 0   | 2               | 2   | 0.250  | 0.369          |
| tr Q23984 Q23984_DROME  | Q23984     | Q9VMD9        | 0                                                                                                                                                                     | 0  | 0  | 2               | 5  | 0   | 0            | 0   | 2               | 2   | 0.217  | 0.342          |
| tr Q9SS19 Q9SS19_DROME  | Q9SS19     | CG3868        | 0                                                                                                                                                                     | 0  | 0  | 2               | 5  | 0   | 0            | 0   | 2               | 2   | 0.217  | 0.342          |
| tr Q9XZ34 Q9XZ34_DROME  | Q9XZ34     | RifI          | 0                                                                                                                                                                     | 0  | 0  | 0               | 7  | 0   | 0            | 0   | 2               | 2   | 0.374  | 0.386          |
| tr Q8T4A8 Q8T4A8_DROME  | Q8T4A8     | CG7542        | 0                                                                                                                                                                     | 0  | 0  | 0               | 3  | 4   | 0            | 0   | 2               | 1   | 0.132  | 0.266          |
| sp Q070PY2 PGSB1_DROME  | Q070PY2    | PGRP-SB1      | 0                                                                                                                                                                     | 0  | 0  | 2               | 4  | 0   | 0            | 0   | 2               | 1   | 0.140  | 0.266          |
| tr A1Z8Q2 A1Z8Q2_DROME  | A1Z8Q2     | CG13185       | 0                                                                                                                                                                     | 0  | 0  | 6               | 0  | 0   | 0            | 0   | 2               | 2   | 0.374  | 0.386          |

Group 2: In both *w<sup>1118</sup>* and mutant but > 2-fold greater in *dKlf15<sup>NN</sup>* mutant

Uniprot ID Annotation w1118 dKlf15NN w1118 dKlf15NN

|                        |          |               | #1  | #2  | #3  | #1  | #2  | #3   | Mean | SEM | Mean | SEM | Fold change | t-Test | B-H Correction |
|------------------------|----------|---------------|-----|-----|-----|-----|-----|------|------|-----|------|-----|-------------|--------|----------------|
| tr A1ZBU8 A1ZBU8_DROME | A1ZBU8   | CG18067       | 0   | 9   | 0   | 66  | 101 | 72   | 3    | 3   | 80   | 11  | 25.6        | 0.003  | 0.159          |
| tr Q8SXG0 Q8SXG0_DROME | Q8SXG0   | CG5162        | 3   | 16  | 0   | 27  | 44  | 132  | 6    | 5   | 68   | 32  | 10.7        | 0.135  | 0.247          |
| tr Q9V3Y7 Q9V3Y7_DROME | Q9V3Y7   | CG15293       | 0   | 12  | 0   | 22  | 49  | 42   | 4    | 4   | 38   | 8   | 9.5         | 0.019  | 0.172          |
| sp P54192 PBP2_DROME   | P54192   | Pbprp2        | 2   | 12  | 8   | 22  | 71  | 86   | 7    | 3   | 59   | 19  | 8.0         | 0.057  | 0.183          |
| tr Q7JYZ0 Q7JYZ0_DROME | Q7JYZ0   | CG6426        | 0   | 7   | 0   | 8   | 17  | 26   | 2    | 2   | 17   | 5   | 7.7         | 0.058  | 0.183          |
| tr Q7KMM4 Q7KMM4_DROME | Q7KMM4   | BcDNA.GH04962 | 0   | 8   | 0   | 12  | 17  | 24   | 3    | 3   | 18   | 3   | 6.7         | 0.026  | 0.172          |
| sp Q9V3Y3 DFP_DROME    | Q9V3Y3   | I2J34Fe       | 0   | 9   | 0   | 18  | 15  | 26   | 3    | 3   | 20   | 3   | 6.3         | 0.022  | 0.172          |
| tr Q9W227 Q9W227_DROME | Q9W227   | CG2852        | 5   | 17  | 10  | 39  | 52  | 106  | 11   | 4   | 66   | 20  | 6.1         | 0.057  | 0.183          |
| sp Q07171-1 GELS_DROME | Q07171   | Gel           | 2   | 45  | 24  | 80  | 155 | 154  | 24   | 12  | 130  | 25  | 5.4         | 0.019  | 0.172          |
| tr Q8SYB5 Q8SYB5_DROME | Q8SYB5   | Jon65Aiv      | 0   | 0   | 10  | 0   | 0   | 0    | 0    | 0   | 17   | 4   | 5.1         | 0.052  | 0.183          |
| tr Q7K533 Q7K533_DROME | Q7K533   | CG11395       | 3   | 23  | 0   | 22  | 60  | 46   | 9    | 7   | 43   | 11  | 5.0         | 0.063  | 0.183          |
| tr Q9VH37 Q9VH37_DROME | Q9VH37   | CG12811       | 1   | 5   | 0   | 4   | 7   | 20   | 2    | 2   | 10   | 5   | 4.5         | 0.201  | 0.266          |
| tr Q0K100 Q0K100_DROME | Q0K100   | SP1029        | 6   | 5   | 0   | 9   | 32  | 8    | 4    | 2   | 16   | 8   | 4.3         | 0.197  | 0.266          |
| tr Q7K084 Q7K084_DROME | Q7K084   | Obp44a        | 5   | 12  | 6   | 23  | 31  | 46   | 8    | 2   | 33   | 7   | 4.3         | 0.022  | 0.172          |
| tr Q9W0J9 Q9W0J9_DROME | Q9W0J9   | CG9119        | 1   | 8   | 0   | 5   | 13  | 20   | 3    | 2   | 13   | 4   | 4.0         | 0.131  | 0.247          |
| sp P29746 BNB_DROME    | P29746   | bnb           | 9   | 16  | 22  | 30  | 64  | 90   | 16   | 4   | 61   | 17  | 3.9         | 0.064  | 0.183          |
| tr Q9VCJ8 Q9VCJ8_DROME | Q9VCJ8   | SPE           | 0   | 11  | 0   | 5   | 19  | 18   | 4    | 4   | 14   | 5   | 3.9         | 0.149  | 0.255          |
| sp Q9W1C9 PEB3_DROME   | Q9W1C9   | PebIII        | 2   | 13  | 18  | 22  | 45  | 62   | 11   | 5   | 43   | 12  | 3.8         | 0.065  | 0.183          |
| tr Q8INW9 Q8INW9_DROME | Q8INW9   | fon           | 5   | 21  | 8   | 32  | 27  | 68   | 12   | 5   | 42   | 13  | 3.7         | 0.092  | 0.212          |
| sp Q8ML70-1 IM10_DROME | Q8ML70-1 | IM10          | 3   | 33  | 16  | 44  | 77  | 68   | 17   | 9   | 63   | 10  | 3.6         | 0.026  | 0.172          |
| tr Q9V8F5 IM23_DROME   | Q9V8F5   | IM23          | 4   | 17  | 6   | 26  | 40  | 32   | 9    | 4   | 33   | 4   | 3.5         | 0.014  | 0.172          |
| sp Q06521 VTU3_DROME   | Q06521   | Vm34Ca        | 0   | 8   | 0   | 6   | 8   | 12   | 3    | 3   | 9    | 2   | 3.2         | 0.146  | 0.255          |
| tr Q8MYW6 Q8MYW6_DROME | Q8MYW6   | CG17109       | 0   | 11  | 0   | 5   | 13  | 16   | 4    | 4   | 11   | 3   | 3.2         | 0.186  | 0.266          |
| tr Q9NF33 Q9NF33_DROME | Q9NF33   | EG-103E12.2   | 7   | 36  | 6   | 33  | 60  | 50   | 16   | 10  | 48   | 8   | 2.9         | 0.069  | 0.183          |
| tr O97355 O97355_DROME | O97355   | Tsfl          | 82  | 372 | 88  | 328 | 605 | 642  | 181  | 96  | 525  | 99  | 2.9         | 0.067  | 0.183          |
| tr Q7JWX3 Q7JWX3_DROME | Q7JWX3   | cec           | 6   | 27  | 0   | 30  | 48  | 16   | 11   | 8   | 31   | 9   | 2.9         | 0.169  | 0.259          |
| tr Q8SY60 Q8SY60_DROME | Q8SY60   | CG9928        | 6   | 31  | 24  | 38  | 53  | 82   | 20   | 7   | 58   | 13  | 2.9         | 0.063  | 0.183          |
| tr Q86B19 Q86B19_DROME | Q86B19   | CG18135       | 2   | 39  | 0   | 23  | 47  | 42   | 14   | 13  | 37   | 7   | 2.7         | 0.177  | 0.261          |
| tr Q9NFV5 Q9NFV5_DROME | Q9NFV5   | TEp4          | 9   | 63  | 28  | 54  | 112 | 102  | 33   | 16  | 89   | 18  | 2.7         | 0.079  | 0.199          |
| tr Q9W306 Q9W306_DROME | Q9W306   | CG9691        | 0   | 8   | 0   | 4   | 9   | 8    | 3    | 3   | 7    | 2   | 2.7         | 0.226  | 0.289          |
| tr A1ZAU4 A1ZAU4_DROME | A1ZAU4   | CG4847-RD     | 0   | 11  | 0   | 3   | 15  | 10   | 4    | 4   | 9    | 3   | 2.6         | 0.304  | 0.330          |
| tr Q8IN51 Q8IN51_DROME | Q8IN51   | CG31205-RB    | 10  | 35  | 26  | 30  | 61  | 88   | 24   | 7   | 60   | 17  | 2.5         | 0.116  | 0.246          |
| sp Q10714 ACE_DROME    | Q10714   | Ance          | 0   | 13  | 0   | 9   | 19  | 6    | 4    | 4   | 11   | 4   | 2.5         | 0.317  | 0.336          |
| tr Q8SZN1 Q8SZN1_DROME | Q8SZN1   | CG31313       | 1   | 17  | 0   | 11  | 16  | 20   | 6    | 6   | 16   | 3   | 2.5         | 0.196  | 0.266          |
| tr A1Z7H7 A1Z7H7_DROME | A1Z7H7   | CG8586-RA     | 0   | 16  | 0   | 10  | 17  | 12   | 5    | 5   | 13   | 2   | 2.5         | 0.240  | 0.289          |
| sp P06607 VIT3_DROME   | P06607   | Yp3           | 122 | 479 | 380 | 510 | 719 | 1184 | 327  | 106 | 804  | 199 | 2.5         | 0.102  | 0.225          |
| sp Q8MLZ7 IDGF3_DROME  | Q8MLZ7   | Idgf3         | 1   | 29  | 0   | 16  | 36  | 22   | 10   | 10  | 25   | 6   | 2.5         | 0.266  | 0.313          |
| tr Q7K127 Q7K127_DROME | Q7K127   | CG7997        | 4   | 24  | 0   | 11  | 35  | 24   | 9    | 7   | 23   | 7   | 2.5         | 0.240  | 0.289          |
| sp Q9VU58 NPLP2_DROME  | Q9VU58   | Nplp2         | 65  | 328 | 148 | 226 | 405 | 694  | 180  | 78  | 442  | 136 | 2.5         | 0.171  | 0.259          |
| tr A1ZB61 A1ZB61_DROME | A1ZB61   | CG15067       | 14  | 21  | 22  | 28  | 56  | 56   | 19   | 3   | 47   | 9   | 2.4         | 0.047  | 0.183          |
| tr Q9Y141 Q9Y141_DROME | Q9Y141   | BcDNA.GH05741 | 1   | 13  | 0   | 4   | 16  | 16   | 5    | 4   | 12   | 4   | 2.4         | 0.291  | 0.330          |
| tr Q9VA42 Q9VA42_DROME | Q9VA42   | Npc2g         | 10  | 41  | 28  | 30  | 83  | 78   | 27   | 9   | 63   | 17  | 2.4         | 0.127  | 0.247          |
| tr Q8IPH4 Q8IPH4_DROME | Q8IPH4   | TEp2          | 7   | 39  | 4   | 28  | 37  | 52   | 17   | 11  | 39   | 7   | 2.3         | 0.161  | 0.259          |
| sp Q86Z9-1 PPN_DROME   | Q86Z9-1  | Ppn           | 4   | 65  | 28  | 30  | 60  | 138  | 33   | 18  | 76   | 32  | 2.3         | 0.301  | 0.330          |
| tr Q9VKR8 Q9VKR8_DROME | Q9VKR8   | CG17108       | 16  | 13  | 14  | 50  | 7   | 44   | 14   | 1   | 33   | 13  | 2.3         | 0.230  | 0.289          |
| tr Q9VJQ3 Q9VJQ3_DROME | Q9VJQ3   | yellow-c      | 2   | 9   | 12  | 11  | 21  | 20   | 8    | 3   | 18   | 3   | 2.2         | 0.089  | 0.212          |
| tr Q8IPB7 Q8IPB7_DROME | Q8IPB7   | LM408         | 13  | 96  | 50  | 76  | 117 | 152  | 53   | 24  | 115  | 22  | 2.2         | 0.129  | 0.247          |
| tr A1ZBU5 A1ZBU5_DROME | A1ZBU5   | CG13422       | 1   | 5   | 0   | 2   | 11  | 0    | 2    | 2   | 4    | 3   | 2.1         | 0.557  | 0.568          |
| tr Q9V109 Q9V109_DROME | Q9V109   | CG17919       | 0   | 24  | 4   | 10  | 23  | 26   | 9    | 7   | 20   | 5   | 2.1         | 0.305  | 0.330          |
| tr Q9VA19 Q9VA19_DROME | Q9VA19   | Obp99c        | 31  | 84  | 36  | 82  | 115 | 116  | 50   | 17  | 104  | 11  | 2.1         | 0.055  | 0.183          |
| sp Q9VLJ6 ACER_DROME   | Q9VLJ6   | Acer          | 4   | 73  | 12  | 26  | 72  | 84   | 30   | 22  | 61   | 18  | 2.0         | 0.332  | 0.345          |
| tr Q0E9C3 Q0E9C3_DROME | Q0E9C3   | Sod3          | 0   | 11  | 0   | 0   | 5   | 16   | 4    | 4   | 7    | 5   | 2.0         | 0.579  | 0.579          |
| tr Q9VD48 Q9VD48_DROME | Q9VD48   | CG5791        | 0   | 9   | 6   | 8   | 11  | 12   | 5    | 3   | 10   | 1   | 2.0         | 0.161  | 0.259          |

Group 3: In both w<sup>1118</sup> and mutant and within >0.8 and <2-fold difference

| Uniprot ID               | Annotation | w1118        |     |     | dKlf15NN |     |     | w1118 |     | dKlf15NN |     | Fold change | t-Test | B-H Correction |       |
|--------------------------|------------|--------------|-----|-----|----------|-----|-----|-------|-----|----------|-----|-------------|--------|----------------|-------|
|                          |            | #1           | #2  | #3  | #1       | #2  | #3  | Mean  | SEM | Mean     | SEM |             |        |                |       |
| sp Q9VA16 OB99B_DROME    | Q9VA16     | Obp99b       | 10  | 24  | 36       | 31  | 16  | 90    | 23  | 7        | 46  | 23          | 1.9    | 0.402          | 1.000 |
| sp P02844 VIT2_DROME     | P02844     | Yp2          | 128 | 565 | 274      | 385 | 601 | 876   | 322 | 129      | 621 | 142         | 1.9    | 0.195          | 1.000 |
| tr Q9VVKV2 Q9VVKV2_DROME | Q9VVKV2    | CG5322       | 2   | 13  | 0        | 10  | 11  | 8     | 5   | 4        | 10  | 1           | 1.9    | 0.345          | 1.000 |
| sp P02843 VIT1_DROME     | P02843     | Yp1          | 143 | 775 | 316      | 578 | 784 | 886   | 411 | 188      | 749 | 91          | 1.8    | 0.181          | 1.000 |
| tr Q9VGO8 Q9VGO8_DROME   | Q9VGO8     | yellow-f2    | 4   | 21  | 0        | 12  | 17  | 16    | 8   | 7        | 15  | 2           | 1.8    | 0.375          | 1.000 |
| tr Q9VME1 Q9VME1_DROME   | Q9VME1     | CG42369      | 2   | 16  | 0        | 3   | 9   | 20    | 6   | 5        | 11  | 5           | 1.8    | 0.534          | 1.000 |
| tr Q8SY86 Q8SY86_DROME   | Q8SY86     | CG16704      | 0   | 11  | 10       | 2   | 15  | 20    | 7   | 3        | 12  | 5           | 1.8    | 0.466          | 1.000 |
| tr Q7JQR3 Q7JQR3_DROME   | Q7JQR3     | CG4670       | 0   | 12  | 0        | 5   | 8   | 8     | 4   | 4        | 7   | 1           | 1.7    | 0.518          | 1.000 |
| tr Q86PE8 Q86PE8_DROME   | Q86PE8     | CG5390       | 7   | 25  | 8        | 15  | 25  | 30    | 14  | 6        | 24  | 4           | 1.7    | 0.247          | 1.000 |
| tr Q9VZ24 Q9VZ24_DROME   | Q9VZ24     | CG15201      | 0   | 3   | 6        | 2   | 5   | 8     | 3   | 2        | 5   | 2           | 1.7    | 0.457          | 1.000 |
| tr Q94881 Q94881_DROME   | Q94881     | Lectin-galC1 | 7   | 24  | 18       | 17  | 29  | 46    | 16  | 5        | 27  | 6           | 1.7    | 0.215          | 1.000 |
| tr A1Z6V5 A1Z6V5_DROME   | A1Z6V5     | Spn43Ab      | 4   | 40  | 26       | 19  | 51  | 34    | 23  | 11       | 38  | 10          | 1.6    | 0.360          | 1.000 |
| sp Q8IN44 TOTA_DROME     | Q8IN44     | TotA         | 4   | 77  | 16       | 36  | 55  | 62    | 32  | 23       | 51  | 8           | 1.6    | 0.484          | 1.000 |
| sp Q9V8Y2 OB56A_DROME    | Q9V8Y2     | Obp56a       | 2   | 29  | 8        | 14  | 19  | 28    | 13  | 8        | 20  | 4           | 1.5    | 0.478          | 1.000 |
| sp P08144 AMYA_DROME     | P08144     | Amy-p        | 0   | 53  | 20       | 11  | 43  | 54    | 24  | 16       | 36  | 13          | 1.5    | 0.598          | 1.000 |
| tr Q27598 Q27598_DROME   | Q27598     |              | 1   | 46  | 109      | 92  | 70  | 132   | 82  | 19       | 121 | 27          | 1.5    | 0.309          | 1.000 |
| sp Q9V521 PRPA3_DROME    | Q9V521     | proPo-A3     | 50  | 185 | 102      | 82  | 173 | 232   | 112 | 39       | 162 | 44          | 1.4    | 0.445          | 1.000 |
| sp P23779 CYTL_DROME     | P23779     | Cys          | 27  | 103 | 102      | 70  | 107 | 154   | 77  | 25       | 110 | 24          | 1.4    | 0.401          | 1.000 |
| tr Q0E8C8 Q0E8C8_DROME   | Q0E8C8     | Spn77Ba      | 5   | 20  | 0        | 22  | 8   | 6     | 8   | 6        | 12  | 5           | 1.4    | 0.678          | 1.000 |
| tr Q7K3E2 Q7K3E2_DROME   | Q7K3E2     | CG5080       | 22  | 111 | 18       | 58  | 72  | 82    | 50  | 30       | 71  | 7           | 1.4    | 0.547          | 1.000 |
| sp P08171 EST6_DROME     | P08171     | Est-6        | 24  | 173 | 72       | 56  | 151 | 172   | 90  | 44       | 126 | 36          | 1.4    | 0.555          | 1.000 |
| tr Q2QBM1 Q2QBM1_DROME   | Q2QBM1     | Men          | 7   | 27  | 14       | 19  | 23  | 18    | 16  | 6        | 20  | 1           | 1.3    | 0.526          | 1.000 |
| sp P41572 6PGD_DROME     | P41572     | Pgd          | 4   | 0   |          |     |     |       |     |          |     |             |        |                |       |

|                       |        |           |     |      |      |      |      |      |      |     |      |     |     |       |       |
|-----------------------|--------|-----------|-----|------|------|------|------|------|------|-----|------|-----|-----|-------|-------|
| trQ8MT58 Q8MT58_DROME | Q8MT58 | CG17337   | 1   | 15   | 30   | 3    | 12   | 30   | 15   | 8   | 15   | 8   | 1.0 | 0.995 | 1.000 |
| trQ9VUC1 Q9VUC1_DROME | Q9VUC1 | Hsc70Cb   | 4   | 7    | 12   | 6    | 4    | 12   | 7    | 2   | 7    | 2   | 1.0 | 0.942 | 1.000 |
| spP48375 FKB12_DROME  | P48375 | FK506-bp2 | 12  | 13   | 26   | 8    | 19   | 22   | 17   | 4   | 16   | 4   | 0.9 | 0.894 | 1.000 |
| trO97102 O97102_DROME | O97102 | smf3      | 3   | 3    | 4    | 2    | 3    | 4    | 3    | 0   | 3    | 0   | 0.9 | 0.775 | 1.000 |
| trQ7KRU8 Q7KRU8_DROME | Q7KRU8 | Fer1 HCH  | 28  | 156  | 214  | 26   | 108  | 236  | 133  | 55  | 123  | 61  | 0.9 | 0.917 | 1.000 |
| spQ9V496 APLP_DROME   | Q9V496 | Rfabg     | 829 | 3533 | 2418 | 1111 | 2095 | 3086 | 2260 | 785 | 2097 | 570 | 0.9 | 0.875 | 1.000 |
| trQ8INK2 Q8INK2_DROME | Q8INK2 | fabp      | 11  | 11   | 16   | 11   | 5    | 18   | 13   | 2   | 12   | 4   | 0.9 | 0.797 | 1.000 |
| trQ9V3U6 Q9V3U6_DROME | Q9V3U6 | 26-29-p   | 4   | 3    | 8    | 2    | 5    | 6    | 5    | 2   | 4    | 1   | 0.9 | 0.830 | 1.000 |
| trQ9I7Q5 Q9I7Q5_DROME | Q9I7Q5 | Cpr65Au   | 7   | 17   | 0    | 4    | 9    | 8    | 8    | 5   | 7    | 2   | 0.9 | 0.873 | 1.000 |
| spQ9W303 IDGF4_DROME  | Q9W303 | Idgf4     | 31  | 185  | 54   | 54   | 96   | 88   | 90   | 48  | 79   | 13  | 0.9 | 0.839 | 1.000 |
| trQ9VZR2 Q9VZR2_DROME | Q9VZR2 | Drsl5     | 0   | 5    | 20   | 0    | 0    | 22   | 8    | 6   | 7    | 7   | 0.9 | 0.912 | 1.000 |

Group 4:

In both  $w^{1118}$  and mutant but  $<0.8$  lower in  $dKlf15^{NN}$  mutant

| Uniprot ID             | Annotation | w1118         |     |      | dKlf15NN |     |     | w1118 |     | dKlf15NN |     | Fold change | t-Test | B-H Correction |       |
|------------------------|------------|---------------|-----|------|----------|-----|-----|-------|-----|----------|-----|-------------|--------|----------------|-------|
|                        |            | #1            | #2  | #3   | #1       | #2  | #3  | Mean  | SEM | Mean     | SEM |             |        |                |       |
| spQ05825 ATPB_DROME    | Q05825     | ATPSyn-beta   | 62  | 15   | 46       | 6   | 0   | 0     | 41  | 14       | 2   | 2           | 0.1    | 0.051          | 0.164 |
| spP05661-17 MYSA_DROME | P05661-17  | Mhc           | 264 | 47   | 158      | 42  | 0   | 0     | 156 | 63       | 14  | 14          | 0.1    | 0.092          | 0.193 |
| spP18432 MLR_DROME     | P18432     | Mlc2          | 39  | 12   | 8        | 8   | 0   | 0     | 20  | 10       | 3   | 3           | 0.1    | 0.167          | 0.295 |
| trQ960M4 Q960M4_DROME  | Q960M4     | Prx5          | 19  | 20   | 8        | 5   | 3   | 0     | 16  | 4        | 2   | 1           | 0.2    | 0.033          | 0.130 |
| trO76935 O76935_DROME  | O76935     | Irp-1B        | 12  | 33   | 22       | 6   | 5   | 0     | 22  | 6        | 4   | 2           | 0.2    | 0.043          | 0.156 |
| spP08736 EF1A1_DROME   | P08736     | Ef1alpha48D   | 26  | 29   | 152      | 9   | 25  | 0     | 69  | 41       | 11  | 7           | 0.2    | 0.242          | 0.396 |
| spP13060-1 EF2_DROME   | P13060     | Ef2b          | 32  | 23   | 44       | 5   | 7   | 6     | 33  | 6        | 6   | 1           | 0.2    | 0.012          | 0.091 |
| trQ9W330 Q9W330_DROME  | Q9W330     | Hex-A         | 100 | 92   | 30       | 33  | 7   | 0     | 74  | 22       | 13  | 10          | 0.2    | 0.066          | 0.180 |
| spQ9W401-1 CISY_DROME  | Q9W401     | kdn           | 81  | 44   | 84       | 18  | 13  | 8     | 70  | 13       | 13  | 3           | 0.2    | 0.013          | 0.091 |
| spP31409 VATB_DROME    | P31409     | Vha55         | 13  | 5    | 18       | 5   | 3   | 0     | 12  | 4        | 2   | 1           | 0.2    | 0.072          | 0.180 |
| trQ24349 Q24349_DROME  | Q24349     | Gdi           | 6   | 9    | 14       | 6   | 0   | 0     | 10  | 2        | 2   | 2           | 0.2    | 0.073          | 0.180 |
| spP13706-2 GPDA_DROME  | P13706-2   | Gpdh          | 683 | 1108 | 776      | 268 | 309 | 0     | 856 | 129      | 192 | 97          | 0.2    | 0.015          | 0.091 |
| spQ24560 TBB1_DROME    | Q24560     | betaTub56D    | 36  | 36   | 22       | 10  | 12  | 0     | 31  | 5        | 7   | 4           | 0.2    | 0.015          | 0.091 |
| spQ9VWH4-1 IDH3A_DROME | Q9VWH4-1   | I(1)G0156     | 25  | 16   | 38       | 7   | 5   | 6     | 26  | 6        | 6   | 1           | 0.2    | 0.034          | 0.130 |
| spQ9Y0Y2 PURA_DROME    | Q9Y0Y2     | CG17273       | 19  | 12   | 16       | 7   | 4   | 0     | 16  | 2        | 4   | 2           | 0.2    | 0.014          | 0.091 |
| trQ8IQW5 Q8IQW5_DROME  | Q8IQW5     | HspB8         | 13  | 23   | 14       | 6   | 3   | 4     | 16  | 3        | 4   | 1           | 0.2    | 0.019          | 0.109 |
| spP20478-1 GLNA2_DROME | P20478     | Gs2           | 34  | 29   | 28       | 10  | 9   | 4     | 30  | 2        | 8   | 2           | 0.3    | 0.001          | 0.034 |
| spP06603 TBA1_DROME    | P06603     | alphaTub84B   | 30  | 25   | 62       | 13  | 17  | 0     | 39  | 12       | 10  | 5           | 0.3    | 0.084          | 0.193 |
| spP92177-1 I433E_DROME | P92177-1   | 14-3-3epsilon | 10  | 27   | 28       | 0   | 11  | 6     | 21  | 6        | 6   | 3           | 0.3    | 0.075          | 0.180 |
| trQ9VLS4 Q9VLS4_DROME  | Q9VLS4     | CG8498        | 15  | 9    | 0        | 6   | 0   | 0     | 8   | 4        | 2   | 2           | 0.3    | 0.287          | 0.428 |
| trQ9VQB4 Q9VQB4_DROME  | Q9VQB4     | CG3609        | 8   | 16   | 6        | 0   | 4   | 4     | 10  | 3        | 3   | 1           | 0.3    | 0.089          | 0.193 |
| trQ8IPA2 Q8IPA2_DROME  | Q8IPA2     | Mal-B2        | 6   | 27   | 2        | 0   | 9   | 0     | 12  | 8        | 3   | 3           | 0.3    | 0.365          | 0.482 |
| spP42281 ACBP_DROME    | P42281     | Dbi           | 0   | 15   | 28       | 0   | 12  | 0     | 14  | 8        | 4   | 4           | 0.3    | 0.320          | 0.458 |
| trB7Z001 B7Z001_DROME  | B7Z001     | CG3523        | 91  | 208  | 174      | 39  | 47  | 48    | 158 | 35       | 45  | 3           | 0.3    | 0.032          | 0.130 |
| trQ9VU38 Q9VU38_DROME  | Q9VU38     | AdenoK        | 6   | 13   | 8        | 2   | 5   | 0     | 9   | 2        | 3   | 2           | 0.3    | 0.072          | 0.180 |
| spP41043 GST1_DROME    | P41043     | GstI1         | 60  | 60   | 64       | 27  | 20  | 6     | 61  | 1        | 18  | 6           | 0.3    | 0.002          | 0.039 |
| spP84029 CYC2_DROME    | P84029     | Cyt-c-p       | 12  | 67   | 12       | 2   | 20  | 4     | 30  | 18       | 9   | 6           | 0.3    | 0.325          | 0.459 |
| trARDZ21 ARDZ21_DROME  | ARDZ21     | Acon          | 72  | 31   | 96       | 18  | 15  | 26    | 66  | 19       | 20  | 3           | 0.3    | 0.074          | 0.180 |
| spQ7KN62-1 TERA_DROME  | Q7KN62     | TER94         | 10  | 7    | 16       | 7   | 3   | 0     | 11  | 3        | 3   | 2           | 0.3    | 0.087          | 0.193 |
| trQ9VK18 Q9VK18_DROME  | Q9VK18     | CG6287        | 15  | 23   | 26       | 6   | 7   | 6     | 21  | 3        | 6   | 0           | 0.3    | 0.011          | 0.091 |
| spP29310-2 I433Z_DROME | P29310-2   | 14-3-3zeta    | 0   | 107  | 78       | 0   | 20  | 36    | 62  | 32       | 19  | 10          | 0.3    | 0.270          | 0.414 |
| spP52034-1 K6PF_DROME  | P52034     | Pfk           | 111 | 80   | 68       | 50  | 27  | 4     | 86  | 13       | 27  | 13          | 0.3    | 0.033          | 0.130 |
| spP11147 HSP7D_DROME   | P11147     | Hsc70-4       | 20  | 49   | 86       | 17  | 15  | 18    | 52  | 19       | 16  | 3           | 0.3    | 0.138          | 0.258 |
| trQ8IQ18 Q8IQ18_DROME  | Q8IQ18     | Dp            | 14  | 23   | 0        | 12  | 0   | 0     | 12  | 7        | 4   | 4           | 0.3    | 0.344          | 0.472 |
| spP07764-1 ALF_DROME   | P07764     | Ald           | 728 | 1353 | 674      | 292 | 281 | 332   | 919 | 218      | 302 | 15          | 0.3    | 0.048          | 0.159 |
| spP52029 G6P1_DROME    | P52029     | Pgi           | 119 | 212  | 122      | 50  | 48  | 52    | 151 | 30       | 50  | 1           | 0.3    | 0.030          | 0.130 |
| spQ9VUY9 PGM_DROME     | Q9VUY9     | Pgm           | 27  | 69   | 38       | 16  | 21  | 8     | 45  | 13       | 15  | 4           | 0.3    | 0.090          | 0.193 |
| spQ9VFC8-1 GYS_DROME   | Q9VFC8     | CG6904        | 74  | 64   | 66       | 24  | 28  | 20    | 68  | 3        | 24  | 2           | 0.4    | 0.000          | 0.000 |
| trQ8IQF8 Q8IQF8_DROME  | Q8IQF8     | CG6084        | 12  | 24   | 34       | 8   | 17  | 0     | 23  | 6        | 8   | 5           | 0.4    | 0.141          | 0.259 |
| spP29310-1 I433Z_DROME | P29310     | 14-3-3zeta    | 94  | 109  | 86       | 42  | 27  | 36    | 96  | 7        | 35  | 5           | 0.4    | 0.002          | 0.039 |
| trQ9Y119 Q9Y119_DROME  | Q9Y119     | Tps1          | 34  | 51   | 68       | 22  | 31  | 4     | 51  | 10       | 19  | 8           | 0.4    | 0.063          | 0.180 |
| trQ9VEB1 Q9VEB1_DROME  | Q9VEB1     | Mdh2          | 44  | 37   | 64       | 17  | 12  | 26    | 48  | 8        | 18  | 4           | 0.4    | 0.028          | 0.130 |
| spP91938-1 TRXR1_DROME | P91938     | Trxr-1        | 8   | 25   | 26       | 3   | 12  | 8     | 20  | 6        | 8   | 3           | 0.4    | 0.129          | 0.246 |
| trQ9Y112 Q9Y112_DROME  | Q9Y112     | BcDNA.GH10614 | 4   | 12   | 26       | 2   | 11  | 4     | 14  | 6        | 5   | 3           | 0.4    | 0.295          | 0.434 |
| trE1JGQ5 E1JGQ5_DROME  | E1JGQ5     | CG9485        | 0   | 76   | 0        | 10  | 9   | 10    | 25  | 25       | 10  | 0           | 0.4    | 0.576          | 0.674 |
| spP83967 ACT6_DROME    | P83967     | Act88F        | 117 | 93   | 128      | 67  | 65  | 0     | 113 | 10       | 44  | 22          | 0.4    | 0.048          | 0.159 |
| spP48602 VATA1_DROME   | P48602     | Vha68-1       | 10  | 15   | 0        | 7   | 3   | 0     | 8   | 4        | 3   | 2           | 0.4    | 0.353          | 0.472 |
| spQ9XTL9 PYG_DROME     | Q9XTL9     | GlyP          | 423 | 597  | 520      | 184 | 221 | 202   | 513 | 50       | 202 | 11          | 0.4    | 0.004          | 0.046 |
| spP29613-1 TPIS_DROME  | P29613-1   | Tpi           | 172 | 233  | 202      | 90  | 76  | 78    | 203 | 18       | 81  | 4           | 0.4    | 0.003          | 0.039 |
| spO62619-1 KPYK_DROME  | O62619-1   | PyK           | 375 | 492  | 382      | 170 | 161 | 172   | 416 | 38       | 168 | 3           | 0.4    | 0.003          | 0.039 |
| trQ8IQG9 Q8IQG9_DROME  | Q8IQG9     | Adk1          | 14  | 23   | 18       | 9   | 9   | 4     | 18  | 2        | 7   | 2           | 0.4    | 0.022          | 0.119 |
| trQ9VGB6 Q9VGB6_DROME  | Q9VGB6     | Pglym87       | 20  | 20   | 38       | 10  | 8   | 14    | 26  | 6        | 11  | 2           | 0.4    | 0.070          | 0.180 |
| spQ01604 PGK_DROME     | Q01604     | Pgk           | 245 | 244  | 280      | 125 | 93  | 102   | 256 | 12       | 107 | 9           | 0.4    | 0.001          | 0.034 |
| trA1Z7Z4 A1Z7Z4_DROME  | A1Z7Z4     | CG1648        | 3   | 4    | 12       | 0   | 8   | 0     | 6   | 3        | 3   | 3           | 0.4    | 0.401          | 0.511 |
| trQ7KSU6 Q7KSU6_DROME  | Q7KSU6     | CG8036        | 12  | 20   | 72       | 15  | 11  | 18    | 35  | 19       | 15  | 2           | 0.4    | 0.350          | 0.472 |
| trQ961N7 Q961N7_DROME  | Q961N7     | CG5355        | 9   | 12   | 4        | 4   | 3   | 4     | 8   | 2        | 4   | 0           | 0.4    | 0.115          | 0.230 |
| spP17336 CATA_DROME    | P17336     | Cat           | 10  | 45   | 42       | 8   | 20  | 14    | 32  | 11       | 14  | 3           | 0.4    | 0.197          | 0.338 |
| trQ9VK60 Q9VK60_DROME  | Q9VK60     | CG6180        | 10  | 24   | 24       | 10  | 8   | 8     | 19  | 5        | 9   | 1           | 0.4    | 0.089          | 0.193 |
| spQ9I7S8 PUR6_DROME    | Q9I7S8     | ade5          | 7   | 23   | 10       | 3   | 15  | 0     | 13  | 5        | 6   | 4           | 0.4    | 0.316          | 0.458 |
| spP15007-1 ENO_DROME   | P15007     | Eno           | 760 | 1099 | 624      | 402 | 359 | 346   | 827 | 141      | 369 | 17          | 0.4    | 0.032          | 0.130 |
| spP07486 G3P1_DROME    | P07486     | Gapdh1        | 785 | 935  | 592      | 391 | 300 | 348   | 771 | 99       | 346 | 26          | 0.4    | 0.014          | 0.091 |
| spP02828 HSP83_DROME   | P02828     | Hsp83         | 31  | 43   | 74       | 21  | 24  | 26    | 49  | 13       | 24  | 2           | 0.5    | 0.116          | 0.230 |
| trQ9VF24 Q9VF24_DROME  | Q9VF24     | cv-d          | 3   | 56   | 14       | 10  | 13  | 12    | 24  | 16       | 12  | 1           | 0.5    | 0.477          | 0.591 |
| trQ9SRT1 Q9SRT1_DROME  | Q9SRT1     | CG11089       | 5   | 12   | 10       | 4   | 9   | 0     | 9   | 2        | 4   | 3           | 0.5    | 0.241          | 0.396 |
| spP48610-1 KARG_DROME  | P48610     | Argk          | 465 | 588  | 532      | 246 | 243 | 296   | 528 | 36       | 261 | 17          | 0.5    | 0.003          | 0.039 |
| spP07487 G3P2_DROME    | P07487     | Gapdh2        | 724 | 864  | 598      | 404 | 356 | 334   | 729 | 77       | 365 | 21          | 0.5    | 0.010          | 0.091 |
| trB7Z0E0 B7Z0E0_DROME  | B7Z0E0     | Idh           | 22  | 27   | 28       | 13  | 20  | 6     | 26  | 2        | 13  | 4           | 0.5    | 0.044          | 0.156 |
| trQ8MSI2 Q8MSI2_DROME  | Q8MSI2     | Sep1          | 27  | 235  | 426      | 14  | 124 | 208   | 229 | 115      | 115 | 56          | 0.5    | 0.425          | 0.534 |
| spP45594 CADF_DROME    | P45594     | tsr           | 22  | 24   | 22       | 7   | 11  | 18    | 23  | 1        | 12  | 3           | 0.5    | 0.032          | 0.130 |
| spP00334 ADH_DROME     | P00334     | Adh           | 303 | 572  | 472      | 201 | 251 | 266   | 449 | 79       | 239 | 20          | 0.5    | 0.061          | 0.180 |
| spP02572 ACT2_DROME    | P02572     | Act42A        | 64  | 67   | 126      | 0   | 60  | 78    | 86  | 20       | 46  | 24          | 0.5    | 0.271          | 0.414 |
| spP08879 NDKA_DROME    | P08879     | awd           | 0   | 53   | 126      | 1   | 15  | 84    | 60  | 37       | 33  | 26          | 0.6    | 0.583          | 0.675 |
| trQ9VGS2 TCTP_DROME    | Q9VGS2     | Tctp          | 8   | 11   | 12       | 3   | 8   | 6     | 10  | 1        | 6   | 1           | 0.6    | 0.063          | 0.180 |
| trQ8MQS7 Q8MQS7_DROME  | Q8MQS7     | Mdh1          | 28  | 48   | 24       | 18  | 33  | 4     | 33  | 7        | 19  | 8           | 0.6    | 0.265          | 0.414 |
| spQ9V3P0 PRDX1_DROME   | Q9V3P0     | Jafracl       | 21  | 40   | 30       | 10  | 21  | 20    | 30  | 6        | 17  | 3           | 0.6    | 0.115          | 0.230 |
| spQ9VAN0 SERC_DROME    | Q9VAN0     | CG11899       | 4   | 11   | 8        | 3   | 4   | 6</   |     |          |     |             |        |                |       |



|                         |        |               |    |     |     |    |     |     |     |    |     |    |     |       |       |
|-------------------------|--------|---------------|----|-----|-----|----|-----|-----|-----|----|-----|----|-----|-------|-------|
| sp P61851 SODC_DROME    | P61851 | Sod           | 35 | 45  | 76  | 20 | 31  | 54  | 52  | 12 | 35  | 10 | 0.7 | 0.338 | 0.470 |
| sp P20432 GSTT1_DROME   | P20432 | GstD1         | 13 | 31  | 56  | 10 | 19  | 38  | 33  | 13 | 22  | 8  | 0.7 | 0.513 | 0.617 |
| tr Q9VGA0 Q9VGA0_DROME  | Q9VGA0 | GstD9         | 12 | 11  | 0   | 6  | 8   | 2   | 8   | 4  | 5   | 2  | 0.7 | 0.605 | 0.692 |
| sp P25007 PPIA_DROME    | P25007 | Cyp1          | 26 | 37  | 54  | 19 | 28  | 34  | 39  | 8  | 27  | 4  | 0.7 | 0.258 | 0.414 |
| sp P0CG69 UBIQP_DROME   | P0CG69 | Ubi-p63E      | 3  | 4   | 24  | 2  | 4   | 16  | 10  | 7  | 7   | 4  | 0.7 | 0.741 | 0.763 |
| sp Q9V429-1 THIO2_DROME | Q9V429 | Trx-2         | 6  | 5   | 6   | 3  | 5   | 4   | 6   | 0  | 4   | 1  | 0.7 | 0.073 | 0.180 |
| tr Q9VHA1 Q9VHA1_DROME  | Q9VHA1 | SpdS          | 3  | 7   | 0   | 2  | 3   | 2   | 3   | 2  | 2   | 0  | 0.7 | 0.680 | 0.737 |
| sp P36951 HY1_DROME     | P36951 | Gip           | 4  | 17  | 6   | 3  | 11  | 6   | 9   | 4  | 7   | 2  | 0.7 | 0.639 | 0.715 |
| sp P02574 ACT4_DROME    | P02574 | Act79B        | 89 | 77  | 0   | 55 | 68  | 0   | 55  | 28 | 41  | 21 | 0.7 | 0.702 | 0.751 |
| sp Q02748 IF4A_DROME    | Q02748 | eIF-4a        | 14 | 17  | 18  | 5  | 11  | 22  | 17  | 1  | 12  | 5  | 0.8 | 0.482 | 0.591 |
| tr Q9W370 Q9W370_DROME  | Q9W370 | CG15369       | 14 | 21  | 12  | 14 | 7   | 16  | 16  | 3  | 12  | 3  | 0.8 | 0.399 | 0.511 |
| tr Q9U4U2 Q9U4U2_DROME  | Q9U4U2 | Fer2LCH       | 25 | 231 | 270 | 29 | 136 | 250 | 175 | 76 | 138 | 64 | 0.8 | 0.730 | 0.763 |
| sp P05303 EF1A2_DROME   | P05303 | Ef1alpha100E  | 34 | 27  | 0   | 10 | 23  | 16  | 20  | 10 | 16  | 4  | 0.8 | 0.736 | 0.763 |
| tr Q8SXA6 Q8SXA6_DROME  | Q8SXA6 | CG6045        | 7  | 36  | 6   | 9  | 19  | 12  | 16  | 10 | 13  | 3  | 0.8 | 0.780 | 0.795 |
| tr Q961T9 Q961T9_DROME  | Q961T9 | BG:DS00941.11 | 0  | 11  | 0   | 0  | 3   | 6   | 4   | 4  | 3   | 2  | 0.8 | 0.874 | 0.874 |
| tr Q8SXB9 Q8SXB9_DROME  | Q8SXB9 | CG10433       | 4  | 28  | 18  | 5  | 9   | 28  | 17  | 7  | 14  | 7  | 0.8 | 0.813 | 0.821 |

Group 5:

Present in w<sup>1118</sup> control but undetected in *dklf15<sup>NN</sup>* mutant  
(a mean of two spectral counts or lower was regarded as undetected)

| Uniprot ID             | Annotation | w1118         | dklf15NN | w1118 | dklf15NN | Mean | SEM | Mean | SEM | t-Test | B-H Correction |       |       |
|------------------------|------------|---------------|----------|-------|----------|------|-----|------|-----|--------|----------------|-------|-------|
|                        |            | #1 #2 #3      | #1 #2 #3 | Mean  | SEM      | Mean | SEM |      |     |        |                |       |       |
| tr E1J191 E1J191_DROME | E1J191     | UGP           | 90       | 105   | 0        | 0    | 0   | 65   | 33  | 0      | 0              | 0.118 | 0.407 |
| sp P53501 ACT3_DROME   | P53501     | Act57B        | 0        | 0     | 106      | 0    | 0   | 35   | 35  | 0      | 0              | 0.374 | 0.407 |
| tr Q7KVP4 Q7KVP4_DROME | Q7KVP4     | CG9485        | 48       | 0     | 44       | 0    | 0   | 31   | 15  | 0      | 0              | 0.117 | 0.407 |
| tr A1ZA66 A1ZA66_DROME | A1ZA66     | Strn-Mlck     | 45       | 0     | 28       | 0    | 0   | 24   | 13  | 0      | 0              | 0.137 | 0.407 |
| sp P35381 ATPA_DROME   | P35381     | blw           | 37       | 9     | 16       | 5    | 0   | 21   | 8   | 2      | 2              | 0.085 | 0.407 |
| sp P19889 RLA0_DROME   | P19889     | RpLP0         | 11       | 3     | 32       | 0    | 0   | 15   | 9   | 0      | 0              | 0.154 | 0.407 |
| tr A1Z992 A1Z992_DROME | A1Z992     | AGBE          | 6        | 29    | 10       | 0    | 0   | 15   | 7   | 0      | 0              | 0.104 | 0.407 |
| tr A8JNU6 A8JNU6_DROME | A8JNU6     | Nc73EF        | 34       | 9     | 0        | 0    | 0   | 15   | 10  | 0      | 0              | 0.229 | 0.407 |
| sp P08570 RLA1_DROME   | P08570     | RpLP1         | 7        | 7     | 26       | 2    | 0   | 13   | 6   | 1      | 1              | 0.130 | 0.407 |
| sp Q27331 VATA2_DROME  | Q27331     | Vha68-2       | 13       | 11    | 16       | 0    | 0   | 13   | 2   | 0      | 0              | 0.001 | 0.075 |
| tr A8JRB8 A8JRB8_DROME | A8JRB8     | CG5028-RC     | 13       | 9     | 16       | 4    | 0   | 13   | 2   | 1      | 1              | 0.008 | 0.224 |
| sp P11996 LSP1B_DROME  | P11996     | Lsp1beta      | 10       | 28    | 0        | 2    | 0   | 13   | 8   | 1      | 1              | 0.227 | 0.407 |
| sp Q96827 EF1B_DROME   | Q96827     | Ef1beta       | 6        | 4     | 26       | 3    | 0   | 12   | 7   | 1      | 1              | 0.199 | 0.407 |
| tr Q9VGG1 Q9VGG1_DROME | Q9VGG1     | CG5214        | 15       | 8     | 12       | 0    | 0   | 12   | 2   | 0      | 0              | 0.004 | 0.149 |
| tr Q8T447 Q8T447_DROME | Q8T447     | CG9961        | 0        | 0     | 34       | 0    | 0   | 11   | 11  | 0      | 0              | 0.374 | 0.407 |
| tr E2QCF1 E2QCF1_DROME | E2QCF1     | ATPCL         | 4        | 16    | 12       | 3    | 0   | 11   | 3   | 1      | 1              | 0.051 | 0.407 |
| tr Q9VJZ6 Q9VJZ6_DROME | Q9VJZ6     | CG6523        | 10       | 15    | 8        | 6    | 0   | 11   | 2   | 2      | 2              | 0.031 | 0.407 |
| sp P05389 RLA2_DROME   | P05389     | RpLP2         | 4        | 5     | 22       | 2    | 0   | 11   | 6   | 1      | 1              | 0.154 | 0.407 |
| sp P55830-1 RS3A_DROME | P55830     | RpS3A         | 4        | 5     | 20       | 0    | 0   | 10   | 5   | 0      | 0              | 0.120 | 0.407 |
| tr B7Z0V3 B7Z0V3_DROME | B7Z0V3     | CG2767        | 5        | 16    | 8        | 2    | 0   | 10   | 3   | 1      | 1              | 0.055 | 0.407 |
| sp Q06559 RS3_DROME    | Q06559     | RpS3          | 5        | 0     | 24       | 0    | 0   | 10   | 7   | 0      | 0              | 0.252 | 0.407 |
| tr C0PUZ9 C0PUZ9_DROME | C0PUZ9     | Glycogenin-RB | 0        | 17    | 10       | 0    | 0   | 9    | 5   | 0      | 0              | 0.144 | 0.407 |
| tr Q95U38 Q95U38_DROME | Q95U38     | skap          | 15       | 4     | 8        | 0    | 0   | 9    | 3   | 0      | 0              | 0.048 | 0.407 |
| sp Q9VU68-1 WDR1_DROME | Q9VU68     | flr           | 10       | 7     | 10       | 2    | 0   | 9    | 1   | 1      | 1              | 0.004 | 0.149 |
| tr Q8MST5 Q8MST5_DROME | Q8MST5     | betaTub97EF   | 13       | 13    | 0        | 0    | 0   | 9    | 4   | 0      | 0              | 0.116 | 0.407 |
| tr O16043 O16043_DROME | O16043     | Df31          | 0        | 0     | 26       | 0    | 0   | 9    | 9   | 0      | 0              | 0.374 | 0.407 |
| tr Q5U0Z2 Q5U0Z2_DROME | Q5U0Z2     | CG10576       | 0        | 0     | 26       | 0    | 0   | 9    | 9   | 0      | 0              | 0.374 | 0.407 |
| sp P53777 MLP1_DROME   | P53777     | Mlp60A        | 10       | 3     | 12       | 2    | 0   | 8    | 3   | 1      | 1              | 0.065 | 0.407 |
| tr Q9VSU6 Q9VSU6_DROME | Q9VSU6     | Dhpr          | 7        | 17    | 0        | 5    | 0   | 8    | 5   | 2      | 2              | 0.275 | 0.407 |
| sp P38979-1 RSSA_DROME | P38979     | sta           | 5        | 1     | 18       | 0    | 0   | 8    | 5   | 0      | 0              | 0.179 | 0.407 |
| sp P25843 PROF_DROME   | P25843     | chic          | 11       | 13    | 0        | 2    | 1   | 8    | 4   | 1      | 1              | 0.174 | 0.407 |
| sp Q8MLY8 RS8_DROME    | Q8MLY8     | RpS8          | 6        | 4     | 14       | 0    | 0   | 8    | 3   | 0      | 0              | 0.059 | 0.407 |
| tr Q9V104 Q9V104_DROME | Q9V104     | pyd3          | 9        | 15    | 0        | 2    | 0   | 8    | 4   | 1      | 1              | 0.179 | 0.407 |
| tr Q7K860 Q7K860_DROME | Q7K860     | TpnC4         | 7        | 7     | 10       | 6    | 0   | 8    | 1   | 2      | 2              | 0.052 | 0.407 |
| tr Q8MLU2 Q8MLU2_DROME | Q8MLU2     | CG11474       | 7        | 9     | 6        | 2    | 0   | 8    | 1   | 1      | 1              | 0.003 | 0.149 |
| sp Q9VNA5 PSB4_DROME   | Q9VNA5     | Prosbeta7     | 3        | 9     | 10       | 0    | 0   | 7    | 2   | 0      | 0              | 0.029 | 0.407 |
| sp Q9N9H0 EF1G_DROME   | Q9N9H0     | Ef1gamma      | 2        | 4     | 16       | 3    | 0   | 7    | 4   | 1      | 1              | 0.227 | 0.407 |
| sp P02825 HSP71_DROME  | P02825     | Hsp70Ab       | 0        | 0     | 22       | 0    | 0   | 7    | 7   | 0      | 0              | 0.374 | 0.407 |
| sp P14318 MP20_DROME   | P14318     | Mp20          | 5        | 3     | 14       | 0    | 0   | 7    | 3   | 0      | 0              | 0.101 | 0.407 |
| tr Q7JYW9 Q7JYW9_DROME | Q7JYW9     | Hex-C         | 4        | 17    | 0        | 2    | 1   | 7    | 5   | 1      | 1              | 0.314 | 0.407 |
| tr O46111 O46111_DROME | O46111     | Uba1          | 13       | 8     | 0        | 6    | 0   | 7    | 4   | 2      | 2              | 0.289 | 0.407 |
| tr Q9VPZ5 Q9VPZ5_DROME | Q9VPZ5     | CG5397        | 0        | 21    | 0        | 4    | 0   | 7    | 7   | 1      | 1              | 0.469 | 0.491 |
| sp P14130 RS14_DROME   | P14130     | RpS14a        | 4        | 0     | 16       | 3    | 0   | 7    | 5   | 1      | 1              | 0.304 | 0.407 |
| sp P55828 RS20_DROME   | P55828     | RpS20         | 0        | 0     | 20       | 0    | 0   | 7    | 7   | 0      | 0              | 0.374 | 0.407 |
| tr Q8MS44 Q8MS44_DROME | Q8MS44     | CG9468        | 0        | 0     | 20       | 0    | 0   | 7    | 7   | 0      | 0              | 0.374 | 0.407 |
| tr Q0KIE6 Q0KIE6_DROME | Q0KIE6     | CG12582       | 0        | 20    | 0        | 3    | 0   | 7    | 7   | 1      | 1              | 0.453 | 0.481 |
| sp O16797-1 JRL3_DROME | O16797     | RpL3          | 5        | 3     | 12       | 3    | 0   | 7    | 3   | 1      | 1              | 0.135 | 0.407 |
| tr Q9XYZ9 Q9XYZ9_DROME | Q9XYZ9     | GstE12        | 5        | 3     | 12       | 4    | 0   | 7    | 3   | 1      | 1              | 0.161 | 0.407 |
| sp Q94529 GS1_DROME    | Q94529     | Gs1           | 5        | 15    | 0        | 0    | 0   | 7    | 4   | 0      | 0              | 0.197 | 0.407 |
| tr Q9W1B9 Q9W1B9_DROME | Q9W1B9     | RpL12         | 4        | 0     | 16       | 0    | 0   | 7    | 5   | 0      | 0              | 0.245 | 0.407 |
| sp P22769 PSA71_DROME  | P22769     | Pros28.1      | 3        | 11    | 6        | 0    | 0   | 7    | 2   | 0      | 0              | 0.043 | 0.407 |
| tr Q8MT28 Q8MT28_DROME | Q8MT28     | CG10467       | 0        | 13    | 6        | 0    | 0   | 6    | 4   | 0      | 0              | 0.170 | 0.407 |
| sp P12881 PSA1_DROME   | P12881     | Pros35        | 5        | 8     | 6        | 0    | 0   | 6    | 1   | 0      | 0              | 0.001 | 0.075 |
| sp P46222 RL11_DROME   | P46222     | RpL11         | 3        | 4     | 12       | 0    | 0   | 6    | 3   | 0      | 0              | 0.091 | 0.407 |
| sp Q6AWN0 MTND_DROME   | Q6AWN0     | CG32068       | 3        | 4     | 12       | 2    | 0   | 6    | 3   | 1      | 1              | 0.116 | 0.407 |
| sp P35554 FTN_DROME    | P35554     | fln           | 7        | 0     | 12       | 0    | 0   | 6    | 3   | 0      | 0              | 0.147 | 0.407 |
| tr Q76NQ9 Q76NQ9_DROME | Q76NQ9     | AMPdeam       | 8        | 4     | 6        | 2    | 0   | 6    | 1   | 1      | 1              | 0.022 | 0.407 |
| tr Q7K3J0 Q7K3J0_DROME | Q7K3J0     | CG8258        | 7        | 3     | 8        | 0    | 0   | 6    | 2   | 0      | 0              | 0.023 | 0.407 |
| tr Q9VQF7 Q9VQF7_DROME | Q9VQF7     | Bacc          | 0        | 4     | 14       | 0    | 3   | 6    | 4   | 1      | 1              | 0.296 | 0.407 |
| tr Q6WSQ9 Q6WSQ9_DROME | Q6WSQ9     | Mitf          | 0        | 0     | 18       | 0    | 0   | 6    | 6   | 0      | 0              | 0.374 | 0.407 |
| tr Q95S17 Q95S17_DROME | Q95S17     | CG6028        | 6        | 8     | 4        | 1    | 0   | 6    | 1   | 0      | 0              | 0.008 | 0.224 |
| sp P18091-1 ACTN_DROME | P18091     | Actn          | 18       | 0     | 0        | 0    | 0   | 6    | 6   | 0      | 0              | 0.374 | 0.407 |
| tr Q9VA37 Q9VA37_DROME | Q9VA37     | dj-lbeta      | 3        | 11    | 4        | 0    | 0   | 6    | 2   | 1      | 1              | 0.105 | 0.407 |
| sp P41042 RS4_DROME    | P41042     | RpS4          | 1        | 0     | 16       | 0    | 0   | 6    | 5   | 0      | 0              | 0.317 | 0.407 |
| tr Q8MYS9 Q8MYS9_DROME | Q8MYS9     | CG7203        | 7        | 11    | 0        | 2    | 0   | 6    | 3   | 1      | 1              | 0.195 | 0.407 |
| sp P35122 UCLH_DROME   | P35122     | Uch           | 0        | 9     | 8        | 0    | 0   | 6    | 3   | 0      | 0              | 0.118 | 0.407 |
| sp P32100 RL7_DROME    | P32100     | RpL7          | 3        | 0     | 14       | 0    | 0   | 6    | 4   | 0      | 0              | 0.254 | 0.407 |
| sp P48159 RL23_DROME   | P48159     | RpL23         | 3        | 0     | 14       | 0    | 0   | 6    | 4   | 0      | 0              | 0.254 | 0.407 |
| tr Q9VV75 Q9VV75_DROME | Q9VV75     | CG4169        | 9        | 0     | 8        | 0    | 0   | 6    | 3   | 0      | 0              | 0.117 | 0.407 |
| tr Q8IRQ5 Q8IRQ5_DROME | Q8IRQ5     | l1)G0255      | 7        | 9     | 0        | 0    | 0   | 6    | 3   | 0      | 0              | 0.121 | 0.407 |
| tr Q9W3L4 Q9W3L4_DROME | Q9W3L4     | Q9W3L4        | 0        | 11    | 6        | 0    | 0   | 6    | 3   | 0      | 0              | 0.146 | 0.407 |
| tr Q9VD58 Q9VD58_DROME | Q9VD58     | CG6439        | 10       | 0     | 6        | 0    | 0   | 5    | 3   | 0      | 0              | 0.144 | 0.407 |
| tr Q7K5K3 Q7K5K3_DROME | Q7K5K3     | CG11876       | 9        | 1     | 6        | 0    | 0   | 5    | 2   | 0      | 0              | 0.071 | 0.407 |
| sp Q94518 NACA_DROME   | Q94518     | Nacalpa       | 2        | 0     | 14       | 2    | 0   | 5    | 4   | 1      | 1              | 0.327 | 0.407 |
| sp P09180 RL4_DROME    | P09180     | RpL4          | 8        | 0     | 8        | 0    | 0   | 5    | 3   | 0      | 0              | 0.116 | 0.407 |
| tr Q9VTZ0 Q9VTZ0_DROME | Q9VTZ0     | tral          | 0        | 0     | 16       | 0    | 0   | 5    | 5   | 0      | 0              | 0.374 | 0.407 |
| sp P29327-1 RS6_DROME  | P29327     | RpS6          | 6        | 0     | 10       | 0    | 0   | 5    | 3   | 0      | 0              | 0.141 | 0.407 |
| tr Q9GQV2 Q9GQV2_DROME | Q9GQV2     | cher          | 16       | 0     | 0        | 0    | 0   | 5    | 5   | 0      | 0              | 0.374 | 0.407 |
| tr Q9VN21 Q9VN21_DROME | Q9VN21     | lost          | 1        | 0     | 14       | 0    | 0   | 5    | 4   | 0      | 0              | 0.309 | 0.407 |
| sp O18640 GBLP_DROME   | O18640     | Rack1         | 0        | 1     | 14       | 0    | 0   | 5    | 4   | 0      | 0              | 0.316 | 0.407 |
| tr Q9VW19 Q9VW19_DROME | Q9VW19     | CG9372        | 0        | 13    | 2        | 0    | 4   | 5    | 4   | 1      | 1              | 0.435 | 0.466 |
| sp A1ZA47-1 ZASP_DROME | A1ZA47     | Zasp52        | 6        | 5     | 4        | 0    | 0   | 5    | 1   | 0      | 0              |       |       |



|                          |          |              |    |    |    |   |   |   |   |   |   |   |       |       |
|--------------------------|----------|--------------|----|----|----|---|---|---|---|---|---|---|-------|-------|
| sp P06742-1 MLC1_DROME   | P06742   | Mlc1         | 11 | 0  | 4  | 0 | 0 | 0 | 5 | 3 | 0 | 0 | 0.197 | 0.407 |
| tr Q9VB64 Q9VB64_DROME   | Q9VB64   | CG31063      | 0  | 7  | 8  | 0 | 1 | 4 | 5 | 2 | 2 | 1 | 0.320 | 0.407 |
| tr Q961R8 Q961R8_DROME   | Q961R8   | Aats-gly     | 5  | 9  | 0  | 0 | 0 | 0 | 5 | 3 | 0 | 0 | 0.147 | 0.407 |
| tr Q9I7R0 Q9I7R0_DROME   | Q9I7R0   | CG18815      | 2  | 4  | 8  | 0 | 0 | 0 | 5 | 2 | 0 | 0 | 0.050 | 0.407 |
| sp Q26365-2 ADT_DROME    | Q26365-2 | sesB         | 14 | 0  | 0  | 0 | 0 | 0 | 5 | 5 | 0 | 0 | 0.374 | 0.407 |
| sp P29844 HSP7C_DROME    | P29844   | Hsc70-3      | 0  | 0  | 14 | 0 | 0 | 0 | 5 | 5 | 0 | 0 | 0.374 | 0.407 |
| sp P50882 RL9_DROME      | P50882   | RpL9         | 0  | 0  | 14 | 0 | 0 | 0 | 5 | 5 | 0 | 0 | 0.374 | 0.407 |
| tr Q86BQ4 Q86BQ4_DROME   | Q86BQ4   | CG2862       | 6  | 8  | 0  | 4 | 0 | 0 | 5 | 2 | 1 | 1 | 0.293 | 0.407 |
| sp Q9W0P5 GALE_DROME     | Q9W0P5   | Gale         | 4  | 9  | 0  | 0 | 0 | 0 | 5 | 3 | 0 | 0 | 0.163 | 0.407 |
| tr A8JUT4 A8JUT4_DROME   | A8JUT4   | Nfr-2        | 4  | 9  | 0  | 0 | 0 | 0 | 5 | 3 | 0 | 0 | 0.163 | 0.407 |
| sp P49630 RL36_DROME     | P49630   | RpL36        | 1  | 0  | 12 | 0 | 0 | 0 | 4 | 4 | 0 | 0 | 0.299 | 0.407 |
| tr Q7JX87 Q7JX87_DROME   | Q7JX87   | Prx2540-2    | 1  | 12 | 0  | 4 | 0 | 0 | 4 | 4 | 1 | 1 | 0.474 | 0.494 |
| tr Q7KTK9 Q7KTK9_DROME   | Q7KTK9   | CG5261       | 13 | 0  | 0  | 0 | 0 | 0 | 4 | 4 | 0 | 0 | 0.374 | 0.407 |
| sp Q27415-1 NLP_DROME    | Q27415   | Nlp          | 2  | 0  | 10 | 0 | 0 | 0 | 4 | 3 | 0 | 0 | 0.249 | 0.407 |
| sp P48149 RS15A_DROME    | P48149   | RpS15Aa      | 2  | 0  | 10 | 3 | 0 | 0 | 4 | 3 | 1 | 1 | 0.401 | 0.434 |
| sp P06754-1 TPM1_DROME   | P06754-1 | Tm1          | 1  | 3  | 8  | 0 | 0 | 0 | 4 | 2 | 0 | 0 | 0.113 | 0.407 |
| sp Q9W5R8 RL5_DROME      | Q9W5R8   | RpL5         | 0  | 0  | 12 | 0 | 0 | 0 | 4 | 4 | 0 | 0 | 0.374 | 0.407 |
| tr Q8MT23 Q8MT23_DROME   | Q8MT23   | RpL30        | 0  | 0  | 12 | 0 | 0 | 0 | 4 | 4 | 0 | 0 | 0.374 | 0.407 |
| tr Q8INP8 Q8INP8_DROME   | Q8INP8   | CG11980      | 5  | 7  | 0  | 0 | 0 | 0 | 4 | 2 | 0 | 0 | 0.122 | 0.407 |
| sp Q27580 SAHH_DROME     | Q27580   | Ahcy13       | 4  | 8  | 0  | 0 | 0 | 0 | 4 | 2 | 0 | 0 | 0.166 | 0.407 |
| tr Q9VXQ5 Q9VXQ5_DROME   | Q9VXQ5   | Tcp-1zeta    | 4  | 0  | 8  | 0 | 0 | 0 | 4 | 2 | 0 | 0 | 0.166 | 0.407 |
| sp Q9GU68 IFS5A_DROME    | Q9GU68   | eIF-5A       | 4  | 0  | 8  | 5 | 0 | 0 | 4 | 2 | 2 | 2 | 0.457 | 0.483 |
| sp P55841 RL14_DROME     | P55841   | RpL14        | 1  | 0  | 10 | 0 | 0 | 0 | 4 | 3 | 0 | 0 | 0.286 | 0.407 |
| sp P20241-1 NRG_DROME    | P20241   | Nrg          | 1  | 7  | 4  | 0 | 1 | 0 | 4 | 2 | 0 | 0 | 0.130 | 0.407 |
| tr Q9VSL2 Q9VSL2_DROME   | Q9VSL2   | GstO3        | 0  | 5  | 6  | 0 | 0 | 0 | 4 | 2 | 0 | 0 | 0.117 | 0.407 |
| sp Q9VA91 RS7_DROME      | Q9VA91   | RpS7         | 3  | 0  | 8  | 0 | 0 | 0 | 4 | 2 | 0 | 0 | 0.192 | 0.407 |
| sp Q9V9X4 MTNA_DROME     | Q9V9X4   | CG11334      | 1  | 1  | 8  | 0 | 0 | 0 | 4 | 2 | 0 | 0 | 0.176 | 0.407 |
| tr Q8IRH0 Q8IRH0_DROME   | Q8IRH0   | Psa          | 7  | 4  | 0  | 3 | 0 | 0 | 4 | 2 | 1 | 1 | 0.323 | 0.407 |
| tr Q9W2M4 Q9W2M4_DROME   | Q9W2M4   | CG10527      | 0  | 7  | 4  | 0 | 3 | 0 | 4 | 2 | 1 | 1 | 0.279 | 0.407 |
| sp Q9VMR8 TOTM_DROME     | Q9VMR8   | TotM         | 0  | 11 | 0  | 0 | 1 | 0 | 4 | 4 | 0 | 0 | 0.434 | 0.466 |
| tr Q8SXV8 Q8SXV8_DROME   | Q8SXV8   | CG3246       | 0  | 11 | 0  | 0 | 5 | 0 | 4 | 4 | 2 | 2 | 0.678 | 0.690 |
| sp P29843 HSP7A_DROME    | P29843   | P29843       | 5  | 5  | 0  | 0 | 0 | 0 | 4 | 2 | 0 | 0 | 0.116 | 0.407 |
| sp Q94522 SUCA_DROME     | Q94522   | Scsalpha     | 2  | 0  | 8  | 1 | 0 | 0 | 3 | 2 | 0 | 0 | 0.260 | 0.407 |
| sp P02518 HSP27_DROME    | P02518   | Hsp27        | 0  | 0  | 10 | 0 | 0 | 0 | 3 | 3 | 0 | 0 | 0.374 | 0.407 |
| sp P55935 RS9_DROME      | P55935   | RpS9         | 0  | 0  | 10 | 0 | 0 | 0 | 3 | 3 | 0 | 0 | 0.374 | 0.407 |
| tr Q0E916 Q0E916_DROME   | Q0E916   | Dscam1       | 0  | 0  | 10 | 0 | 0 | 0 | 3 | 3 | 0 | 0 | 0.374 | 0.407 |
| tr Q7JW48 Q7JW48_DROME   | Q7JW48   | CG10911      | 0  | 0  | 10 | 0 | 0 | 0 | 3 | 3 | 0 | 0 | 0.374 | 0.407 |
| tr Q9VBR8 Q9VBR8_DROME   | Q9VBR8   | CG11902      | 0  | 0  | 10 | 0 | 0 | 0 | 3 | 3 | 0 | 0 | 0.374 | 0.407 |
| sp P22464-1 ANXB9_DROME  | P22464   | AnnlX        | 4  | 1  | 4  | 0 | 0 | 0 | 1 | 1 | 0 | 0 | 0.029 | 0.407 |
| sp P09491-1 TPM2_DROME   | P09491   | Tm2          | 4  | 5  | 0  | 0 | 0 | 0 | 3 | 2 | 0 | 0 | 0.119 | 0.407 |
| tr Q9VXP6 Q9VXP6_DROME   | Q9VXP6   | capt         | 4  | 5  | 0  | 0 | 0 | 0 | 3 | 2 | 0 | 0 | 0.119 | 0.407 |
| sp Q24407 ATP5J_DROME    | Q24407   | ATPsyn-C16   | 4  | 0  | 6  | 0 | 0 | 0 | 3 | 2 | 0 | 0 | 0.137 | 0.407 |
| tr Q7KVX1 Q7KVX1_DROME   | Q7KVX1   | l(1)G0334    | 7  | 0  | 2  | 0 | 0 | 0 | 3 | 2 | 0 | 0 | 0.230 | 0.407 |
| tr Q9V3W0 Q9V3W0_DROME   | Q9V3W0   | UK114        | 0  | 1  | 8  | 0 | 0 | 0 | 3 | 2 | 0 | 0 | 0.277 | 0.407 |
| sp Q00174 LAMA_DROME     | Q00174   | LanA         | 0  | 9  | 0  | 0 | 0 | 0 | 3 | 3 | 0 | 0 | 0.374 | 0.407 |
| tr Q9V9NK6 Q9V9NK6_DROME | Q9V9NK6  | CG11459      | 0  | 9  | 0  | 0 | 0 | 0 | 3 | 3 | 0 | 0 | 0.374 | 0.407 |
| tr O96299 O96299_DROME   | O96299   | Sodh-2       | 2  | 7  | 0  | 0 | 0 | 0 | 3 | 2 | 0 | 0 | 0.204 | 0.407 |
| tr Q9VM19 Q9VM19_DROME   | Q9VM19   | CG5171       | 2  | 7  | 0  | 1 | 0 | 0 | 3 | 2 | 0 | 0 | 0.243 | 0.407 |
| sp P54385-1 DHE3_DROME   | P54385   | Gdh          | 4  | 0  | 4  | 0 | 0 | 0 | 3 | 1 | 0 | 0 | 0.117 | 0.407 |
| sp P17704 RS17_DROME     | P17704   | RpS17        | 2  | 0  | 6  | 0 | 0 | 0 | 3 | 2 | 0 | 0 | 0.192 | 0.407 |
| sp P41044 CAB32_DROME    | P41044   | Cbp53E       | 8  | 0  | 0  | 0 | 0 | 0 | 3 | 3 | 0 | 0 | 0.374 | 0.407 |
| sp O61231 RL10_DROME     | O61231   | RpL10        | 0  | 0  | 8  | 0 | 0 | 0 | 3 | 3 | 0 | 0 | 0.374 | 0.407 |
| sp O76454 PHS_DROME      | O76454   | Pcd          | 0  | 0  | 8  | 0 | 0 | 0 | 3 | 3 | 0 | 0 | 0.374 | 0.407 |
| sp P02517 HSP26_DROME    | P02517   | Hsp26        | 0  | 0  | 8  | 0 | 0 | 0 | 3 | 3 | 0 | 0 | 0.374 | 0.407 |
| sp P23128-1 DDX6_DROME   | P23128   | me31B        | 0  | 0  | 8  | 0 | 0 | 0 | 3 | 3 | 0 | 0 | 0.374 | 0.407 |
| sp P49847 TAF6_DROME     | P49847   | Taf6         | 0  | 0  | 8  | 0 | 0 | 0 | 3 | 3 | 0 | 0 | 0.374 | 0.407 |
| sp Q9V3S0 CP4G1_DROME    | Q9V3S0   | Cyp4g1       | 0  | 0  | 8  | 0 | 0 | 0 | 3 | 3 | 0 | 0 | 0.374 | 0.407 |
| sp Q9V597 RL31_DROME     | Q9V597   | RpL31        | 0  | 0  | 8  | 0 | 0 | 0 | 3 | 3 | 0 | 0 | 0.374 | 0.407 |
| tr A1Z892 A1Z892_DROME   | A1Z892   | Prx2540-1    | 0  | 0  | 8  | 0 | 0 | 0 | 3 | 3 | 0 | 0 | 0.374 | 0.407 |
| tr Q24150 Q24150_DROME   | Q24150   | Nap1         | 0  | 0  | 8  | 0 | 0 | 0 | 3 | 3 | 0 | 0 | 0.374 | 0.407 |
| tr Q9V9TM9 Q9V9TM9_DROME | Q9V9TM9  | CG32088      | 0  | 0  | 8  | 0 | 0 | 0 | 3 | 3 | 0 | 0 | 0.374 | 0.407 |
| tr A1ZAA5 A1ZAA5_DROME   | A1ZAA5   | Got1         | 5  | 3  | 0  | 0 | 0 | 0 | 3 | 2 | 0 | 0 | 0.156 | 0.407 |
| sp Q00637 SODM_DROME     | Q00637   | Sod2         | 4  | 0  | 4  | 0 | 0 | 0 | 3 | 1 | 0 | 0 | 0.117 | 0.407 |
| tr A1Z6X6 A1Z6X6_DROME   | A1Z6X6   | CG1707       | 2  | 5  | 0  | 0 | 0 | 0 | 3 | 2 | 0 | 0 | 0.178 | 0.407 |
| sp Q8T3U2 RS23_DROME     | Q8T3U2   | RpS23        | 1  | 0  | 6  | 0 | 0 | 0 | 2 | 2 | 0 | 0 | 0.238 | 0.407 |
| sp O02649 CH60_DROME     | O02649   | Hsp60        | 1  | 0  | 6  | 0 | 3 | 0 | 2 | 2 | 1 | 1 | 0.468 | 0.491 |
| tr Q9VJ31 Q9VJ31_DROME   | Q9VJ31   | CG10623      | 4  | 3  | 0  | 0 | 0 | 0 | 2 | 1 | 0 | 0 | 0.141 | 0.407 |
| tr Q9W3B3 Q9W3B3_DROME   | Q9W3B3   | CG1885       | 3  | 4  | 0  | 1 | 0 | 0 | 2 | 1 | 0 | 0 | 0.169 | 0.407 |
| sp Q9VLM8 SYAC_DROME     | Q9VLM8   | Aats-ala     | 7  | 0  | 0  | 0 | 0 | 0 | 2 | 2 | 0 | 0 | 0.374 | 0.407 |
| sp P15278-1 FAS3_DROME   | P15278   | Fas3         | 0  | 7  | 0  | 0 | 0 | 0 | 2 | 2 | 0 | 0 | 0.374 | 0.407 |
| tr A4V464 A4V464_DROME   | A4V464   | Acon         | 0  | 3  | 4  | 0 | 0 | 0 | 2 | 1 | 0 | 0 | 0.132 | 0.407 |
| tr Q8ST39 Q8ST39_DROME   | Q8ST39   | CG9336       | 0  | 3  | 4  | 0 | 1 | 0 | 2 | 1 | 0 | 0 | 0.230 | 0.407 |
| tr Q7KV27 Q7KV27_DROME   | Q7KV27   | CG1640       | 4  | 3  | 0  | 0 | 0 | 0 | 2 | 1 | 0 | 0 | 0.127 | 0.407 |
| tr Q8IP97 Q8IP97_DROME   | Q8IP97   | Pex19        | 4  | 3  | 0  | 2 | 0 | 0 | 2 | 1 | 1 | 1 | 0.264 | 0.407 |
| tr O76902 O76902_DROME   | O76902   | rush         | 2  | 0  | 4  | 0 | 0 | 0 | 2 | 1 | 0 | 0 | 0.147 | 0.407 |
| tr Q8SYA6 Q8SYA6_DROME   | Q8SYA6   | CG7322       | 2  | 4  | 0  | 1 | 0 | 0 | 2 | 1 | 0 | 0 | 0.202 | 0.407 |
| sp O18405 SURF4_DROME    | O18405   | Surf4        | 0  | 0  | 6  | 0 | 0 | 0 | 2 | 2 | 0 | 0 | 0.374 | 0.407 |
| sp P29742 CLH_DROME      | P29742   | Chc          | 0  | 0  | 6  | 0 | 0 | 0 | 2 | 2 | 0 | 0 | 0.374 | 0.407 |
| sp P46150-1 MOEH_DROME   | P46150   | Moe          | 0  | 0  | 6  | 0 | 0 | 0 | 2 | 2 | 0 | 0 | 0.374 | 0.407 |
| sp P46223 RL7A_DROME     | P46223   | RpL7A        | 0  | 0  | 6  | 0 | 0 | 0 | 2 | 2 | 0 | 0 | 0.374 | 0.407 |
| sp P48598-1 IF4E_DROME   | P48598   | eIF-4E       | 0  | 0  | 6  | 0 | 0 | 0 | 2 | 2 | 0 | 0 | 0.374 | 0.407 |
| sp P62152 CALM_DROME     | P62152   | Cam          | 0  | 0  | 6  | 0 | 0 | 0 | 2 | 2 | 0 | 0 | 0.374 | 0.407 |
| sp Q9VG97 GSTT3_DROME    | Q9VG97   | GstD3        | 0  | 0  | 6  | 0 | 0 | 0 | 2 | 2 | 0 | 0 | 0.374 | 0.407 |
| sp Q9VWG3 RS10B_DROME    | Q9VWG3   | RpS10b       | 0  | 0  | 6  | 0 | 0 | 0 | 2 | 2 | 0 | 0 | 0.374 | 0.407 |
| tr A8DZ02 A8DZ02_DROME   | A8DZ02   | kuz          | 0  | 0  | 6  | 0 | 0 | 0 | 2 | 2 | 0 | 0 | 0.374 | 0.407 |
| tr Q8MR43 Q8MR43_DROME   | Q8MR43   | CG1622       | 0  | 0  | 6  | 0 | 0 | 0 | 2 | 2 | 0 | 0 | 0.374 | 0.407 |
| tr Q9V9W2 Q9V9W2_DROME   | Q9V9W2   | RpL6         | 0  | 0  | 6  | 0 | 0 | 0 | 2 | 2 | 0 | 0 | 0.374 | 0.407 |
| sp Q26365-1 ADT_DROME    | Q26365   | sesB         | 0  | 0  | 6  | 2 | 0 | 0 | 2 | 2 | 1 | 1 | 0.607 | 0.621 |
| sp A1ZA47-4 ZASP_DROME   | A1ZA47-4 | Zasp52       | 6  | 0  | 0  | 0 | 0 | 0 | 2 | 2 | 0 | 0 | 0.374 | 0.407 |
| tr D1YSG0 D1YSG0_DROME   | D1YSG0   | bt           | 6  | 0  | 0  | 0 | 0 | 0 | 2 | 2 | 0 | 0 | 0.374 | 0.407 |
| tr Q8IPC2 Q8IPC2_DROME   | Q8IPC2   | CG13138      | 6  | 0  | 0  | 0 | 0 | 0 | 2 | 2 | 0 | 0 | 0.374 | 0.407 |
| tr Q9W2X6 Q9W2X6_DROME   | Q9W2X6   | l(1)G0230    | 6  | 0  | 0  | 1 | 0 | 0 | 2 | 2 | 0 | 0 | 0.439 | 0.468 |
| sp O01666 ATPG_DROME     | O01666   | ATPsyn-gamma | 4  | 0  | 2  | 1 | 0 | 0 | 2 | 1 | 0 | 0 | 0.213 | 0.407 |
| tr Q7KTW5 Q7KTW5_DROME   | Q7KTW5   | CG9391       | 3  | 3  | 0  | 0 | 0 | 0 | 2 | 1 | 0 | 0 | 0.117 | 0.407 |
| sp O97477 INO1_DROME     | O97477   | Inos         | 3  | 3  | 0  | 3 | 0 | 0 | 2 | 1 | 1 | 1 | 0.597 | 0.613 |
| sp P13238 VTU2_DROME     | P13238   | Vm26Ab       | 0  | 5  | 0  | 0 | 0 | 0 | 2 | 2 | 0 | 0 | 0.374 | 0.407 |
| sp Q9VMP9 GNPL_DROME     | Q9VMP9   | Gnpd1a       | 0  | 5  | 0  | 0 | 0 | 0 | 2 | 2 | 0 | 0 | 0.374 | 0.407 |
| tr O97121 O97121_DROME   | O97121   | Eip55E       | 0  | 5  | 0  | 0 | 0 | 0 | 2 | 2 | 0 | 0 | 0.374 | 0.407 |
| tr Q2MGK5 Q2MGK5_DROME   | Q2MGK5   | CG4970       | 0  | 5  | 0  | 0 | 0 | 0 | 2 | 2 | 0 | 0 | 0.374 | 0.407 |
| tr Q8SXR1 Q8SXR1_DROME   | Q8SXR1   | Nlaz         | 0  | 5  |    |   |   |   |   |   |   |   |       |       |

|                        |        |            |   |   |   |   |   |   |   |   |   |   |       |       |
|------------------------|--------|------------|---|---|---|---|---|---|---|---|---|---|-------|-------|
| tr Q4TWT4 Q4TWT4_DROME | Q4TWT4 | su(r)      | 5 | 0 | 0 | 0 | 0 | 0 | 2 | 2 | 0 | 0 | 0.374 | 0.407 |
| tr Q9VSL4 Q9VSL4_DROME | Q9VSL4 | GstO2      | 5 | 0 | 0 | 0 | 0 | 0 | 2 | 2 | 0 | 0 | 0.374 | 0.407 |
| tr Q7KUQ2 Q7KUQ2_DROME | Q7KUQ2 | CG9674-RB  | 4 | 1 | 0 | 0 | 0 | 0 | 2 | 1 | 0 | 0 | 0.197 | 0.407 |
| tr O97428 O97428_DROME | O97428 | cib        | 2 | 3 | 0 | 2 | 4 | 0 | 2 | 1 | 2 | 1 | 0.879 | 0.883 |
| sp Q02645-1 HTS_DROME  | Q02645 | hts        | 1 | 4 | 0 | 0 | 0 | 0 | 2 | 1 | 0 | 0 | 0.267 | 0.407 |
| sp Q9VNT5 TRXR2_DROME  | Q9VNT5 | Trxr-2     | 4 | 0 | 0 | 0 | 0 | 0 | 1 | 1 | 0 | 0 | 0.374 | 0.407 |
| tr A1Z8U4 A1Z8U4_DROME | A1Z8U4 | Cct5       | 4 | 0 | 0 | 0 | 0 | 0 | 1 | 1 | 0 | 0 | 0.374 | 0.407 |
| tr A8DYP0 A8DYP0_DROME | A8DYP0 | Unc-89     | 4 | 0 | 0 | 0 | 0 | 0 | 1 | 1 | 0 | 0 | 0.374 | 0.407 |
| tr Q24062 Q24062_DROME | Q24062 | b          | 4 | 0 | 0 | 0 | 0 | 0 | 1 | 1 | 0 | 0 | 0.374 | 0.407 |
| tr Q9VFF0 Q9VFF0_DROME | Q9VFF0 | CG3731     | 4 | 0 | 0 | 0 | 0 | 0 | 1 | 1 | 0 | 0 | 0.374 | 0.407 |
| tr Q9VH01 Q9VH01_DROME | Q9VH01 | Bruce      | 4 | 0 | 0 | 4 | 0 | 0 | 1 | 1 | 1 | 1 | 0.940 | 0.940 |
| tr Q7JV16 Q7JV16_DROME | Q7JV16 | GstE13     | 3 | 1 | 0 | 0 | 0 | 0 | 1 | 1 | 0 | 0 | 0.171 | 0.407 |
| sp Q95083 PSA5_DROME   | Q95083 | Prosalpha5 | 1 | 3 | 0 | 0 | 0 | 0 | 1 | 1 | 0 | 0 | 0.147 | 0.407 |
| sp Q9XZJ4 PSA6_DROME   | Q9XZJ4 | Prosalpha1 | 1 | 3 | 0 | 0 | 0 | 0 | 1 | 1 | 0 | 0 | 0.147 | 0.407 |
| tr Q967S0 Q967S0_DROME | Q967S0 | Prat2      | 1 | 3 | 0 | 0 | 0 | 0 | 1 | 1 | 0 | 0 | 0.147 | 0.407 |
| tr Q7KSB5 Q7KSB5_DROME | Q7KSB5 | CG4390     | 1 | 3 | 0 | 0 | 3 | 0 | 1 | 1 | 1 | 1 | 0.694 | 0.703 |
| sp Q6NN85-1 SSH_DROME  | Q6NN85 | ssh        | 0 | 4 | 0 | 0 | 0 | 0 | 1 | 1 | 0 | 0 | 0.374 | 0.407 |
| sp Q9V813 MTAP_DROME   | Q9V813 | CG4802     | 0 | 4 | 0 | 0 | 0 | 0 | 1 | 1 | 0 | 0 | 0.374 | 0.407 |
| sp Q9VXX8 RL371_DROME  | Q9VXX8 | RpL37a     | 0 | 0 | 4 | 0 | 0 | 0 | 1 | 1 | 0 | 0 | 0.374 | 0.407 |
| tr A1Z8G7 A1Z8G7_DROME | A1Z8G7 | Listericin | 0 | 4 | 0 | 0 | 0 | 0 | 1 | 1 | 0 | 0 | 0.374 | 0.407 |
| tr A8QI34 A8QI34_DROME | A8QI34 | CG40625    | 0 | 4 | 0 | 0 | 0 | 0 | 1 | 1 | 0 | 0 | 0.374 | 0.407 |
| tr B7YZX6 B7YZX6_DROME | B7YZX6 | CG10600    | 0 | 4 | 0 | 0 | 0 | 0 | 1 | 1 | 0 | 0 | 0.374 | 0.407 |
| tr B7Z076 B7Z076_DROME | B7Z076 | CG6852     | 0 | 0 | 4 | 0 | 0 | 0 | 1 | 1 | 0 | 0 | 0.374 | 0.407 |
| tr O97479 O97479_DROME | O97479 | Sodh-1     | 0 | 4 | 0 | 0 | 0 | 0 | 1 | 1 | 0 | 0 | 0.374 | 0.407 |
| tr Q8INQ3 Q8INQ3_DROME | Q8INQ3 | CG11760-RB | 0 | 4 | 0 | 0 | 0 | 0 | 1 | 1 | 0 | 0 | 0.374 | 0.407 |
| tr Q9U9B0 Q9U9B0_DROME | Q9U9B0 | gig        | 0 | 0 | 4 | 0 | 0 | 0 | 1 | 1 | 0 | 0 | 0.374 | 0.407 |
| tr Q9VPI8 Q9VPI8_DROME | Q9VPI8 | net        | 0 | 0 | 4 | 0 | 0 | 0 | 1 | 1 | 0 | 0 | 0.374 | 0.407 |
| tr Q9VWS5 Q9VWS5_DROME | Q9VWS5 | CG15040    | 0 | 0 | 4 | 0 | 0 | 0 | 1 | 1 | 0 | 0 | 0.374 | 0.407 |
| tr Q9W137 Q9W137_DROME | Q9W137 | CG4707     | 0 | 0 | 4 | 0 | 0 | 0 | 1 | 1 | 0 | 0 | 0.374 | 0.407 |
| tr Q0E8H9 Q0E8H9_DROME | Q0E8H9 | Hexo1      | 0 | 4 | 0 | 0 | 3 | 0 | 1 | 1 | 1 | 1 | 0.795 | 0.802 |
| sp Q9NIV1 E2AK3_DROME  | Q9NIV1 | PEK        | 4 | 0 | 0 | 0 | 0 | 0 | 1 | 1 | 0 | 0 | 0.374 | 0.407 |
| sp Q9V3J1-1 VATH_DROME | Q9V3J1 | VhaSFD     | 4 | 0 | 0 | 0 | 0 | 0 | 1 | 1 | 0 | 0 | 0.374 | 0.407 |
| tr Q9VIQ8 Q9VIQ8_DROME | Q9VIQ8 | CoIV       | 4 | 0 | 0 | 0 | 0 | 0 | 1 | 1 | 0 | 0 | 0.374 | 0.407 |
| tr Q9VKM3 Q9VKM3_DROME | Q9VKM3 | l(2)06225  | 4 | 0 | 0 | 0 | 0 | 0 | 1 | 1 | 0 | 0 | 0.374 | 0.407 |
| tr A1Z784 A1Z784_DROME | A1Z784 | ACC        | 2 | 1 | 0 | 0 | 0 | 0 | 1 | 1 | 0 | 0 | 0.141 | 0.407 |
| tr Q0E993 Q0E993_DROME | Q0E993 | Aats-val   | 2 | 1 | 0 | 0 | 0 | 0 | 1 | 1 | 0 | 0 | 0.141 | 0.407 |
| tr Q1RL06 Q1RL06_DROME | Q1RL06 | GS         | 1 | 0 | 2 | 2 | 0 | 0 | 1 | 1 | 1 | 1 | 0.476 | 0.494 |
