# Supplementary material
Source: PubMed Central journal article supplement (PMC4892765)
Supplement: hcg-9-119-s002.pdf [file hcg-9-119-s002.pdf]

## SPARC-Dependent Cardiomyopathy in *Drosophila*

**Running title:** *Hartley et al.; SPARC-dependent cardiomyopathy in Drosophila*

Paul S. Hartley, PhD<sup>1</sup>; Khaterreh Motamedchaboki, PhD<sup>2</sup>; Rolf Bodmer, PhD<sup>3</sup>;

Karen Ocorr, PhD<sup>3</sup>

<sup>1</sup>Department of Life and Environmental Science, University of Bournemouth, Dorset, United Kingdom; <sup>2</sup>Proteomics Facility, <sup>3</sup>Development, Aging & Regeneration Program, Sanford

Burnham Prebys Medical Discovery Institute, La Jolla, CA

### Correspondence:

Paul S. Hartley, PhD

Department of Life & Environmental Science

University of Bournemouth

Talbot Campus, Poole

Dorset BH12 5BB

United Kingdom

Tel: 01202 961682

E-mail: [phartley@bournemouth.ac.uk](mailto:phartley@bournemouth.ac.uk)

Karen Ocorr, PhD

Sanford Burnham Prebys Medical

Discovery Institute

10901 North Torrey Pines Road

La Jolla, CA 92037

Tel: (858) 646-3100

Fax: (858) 795-5298

[kocorr@sbpdiscovery.org](mailto:kocorr@sbpdiscovery.org)

**Journal Subject Terms:** Contractile function; Cardiomyopathy; Genetics; Genetically Altered and Transgenic Models; Basic Science Research

**Abstract:**

**Background** - The *Drosophila* heart is an important model for studying the genetics underpinning mammalian cardiac function. The system comprises contractile cardiomyocytes, adjacent to which are pairs of highly endocytic pericardial nephrocytes that modulate cardiac function by uncharacterised mechanisms. Identifying these mechanisms and the molecules involved is important because they may be relevant to human cardiac physiology.

**Methods and Results** - This work aimed to identify circulating cardiomodulatory factors of potential relevance to humans using the *Drosophila* nephrocyte-cardiomyocyte system. A Kruppel-Like Factor 15 (*dKlf15*) loss-of-function strategy was used to ablate nephrocytes and then heart function and the hemolymph proteome were analysed. Ablation of nephrocytes led to a severe cardiomyopathy characterised by a lengthening of diastolic interval. Rendering adult nephrocytes dysfunctional by disrupting their endocytic function or temporally-conditional knock-down of *dKlf15* led to a similar cardiomyopathy. Proteomics revealed that nephrocytes regulate the circulating levels of many secreted proteins, the most notable of which was the evolutionarily conserved matricellular protein SPARC (Secreted Protein Acidic and Rich in Cysteine), a protein involved in mammalian cardiac function. Finally, reducing *SPARC* gene dosage ameliorated the cardiomyopathy that developed in the absence of nephrocytes.

**Conclusions** - The data implicate SPARC in the non-cell autonomous control of cardiac function in *Drosophila* and suggest that modulation of *SPARC* gene expression may ameliorate cardiac dysfunction in humans.

**Key words:** cardiomyopathy; circulation; genetics, animal models; genetics, proteomics; genetics, transgenic models; proteomics, SPARC, *Drosophila*

## Introduction

Heart disease is a major cause of mortality worldwide, so identifying mechanisms that regulate cardiac physiology is a crucial step towards its treatment and prevention. Both vertebrate and invertebrate models contribute to our understanding of cardiovascular physiology and the related disease processes affecting humans. The *Drosophila* heart comprises contractile cardiomyocytes and neighbouring pericardial nephrocytes that clear circulating colloids, macromolecules and immune peptides from the hemolymph (blood)<sup>1-3</sup>. This organ system has proven to be a tractable model that permits genetic screens to identify novel pathways relevant to human cardiac performance<sup>4</sup>. In addition, functional studies have contributed to our understanding of how alterations in structural proteins, including adhesion proteins such as Fermitins / Kindlins<sup>5</sup> and contractile proteins such as Myosin and Troponin-T, translate to cardiomyopathy<sup>6</sup>. Additionally, *Drosophila* has facilitated the elucidation of genetic pathways regulating cardiac ageing<sup>7, 8</sup> and diet-induced cardiac and kidney podocyte dysfunction<sup>9-11</sup>.

There is evidence that cardiac phenotypes develop in the *Drosophila* model as a result of nephrocyte dysfunction, however the mechanisms are not well characterised<sup>12-15</sup>. It has also been reported that these cardiac phenotypes may depend on developmental changes to the nephrocyte-cardiomyocyte niche rather than a contribution by nephrocytes to cardiac homeostasis in adulthood<sup>16</sup>. Characterising the non-cell autonomous regulation of heart function in flies is important because it may provide insights into molecules that regulate human cardiac physiology.

The *Drosophila* ortholog of the mammalian transcription factor *Klf15* (also known as Kidney Kruppel-like Factor) has recently been identified as a nephrocyte-restricted gene critical for the cells' differentiation and function<sup>17</sup>. Pericardial nephrocytes in flies homozygous for a

*dKlf15* loss of function allele develop normally during embryonic cardiogenesis but then fail to differentiate during larval development and undergo attrition before pupation, hence adult flies have no pericardial nephrocytes. This enables the nephrocytes' impact on the circulating proteome in adults to be analysed and for nephrocyte-dependent cardiomyocyte control mechanisms to be identified.

In this work we took advantage of the nephrocyte-cardiomyocyte system in *Drosophila* to identify circulating cardiomodulatory factors of potential relevance to humans. Proteomics was used to establish the composition of the circulating proteome in flies with and without nephrocytes. It was found that either the loss of nephrocytes or their function during development led to cardiomyopathy and, contrary to previous reports, loss of nephrocyte function in adulthood also led to cardiomyopathy. Analysis of the hemolymph proteome established that nephrocytes had a broad impact on the circulating secretome. By coupling the proteomics data with genetic experiments we showed that nephrocytes regulated circulating levels of the matricellular protein SPARC and prevent SPARC-dependent cardiomyopathy. SPARC plays multiple roles in mammals. SPARC levels increase in metabolic syndrome and ageing and it is well documented as contributing to pathological tissue fibrosis; however reduced *SPARC* expression can lead to heart rupture in pressure overload models<sup>18</sup>. The current findings suggest that SPARC's role in the mammalian heart may be evolutionarily conserved and that its modulation may ameliorate cardiac dysfunction. The work also highlights the importance of *Drosophila* for the identification and study of cardiomodulatory signals of relevance to human cardiac physiology.

## Materials and Methods

### Strains used in this study

The  $w^{1118}$  (used as wild-type strain in this study),  $dKlf15^{NN}$  (CG2932, FBgn0025679; previously known as  $Bteb2^{f06447}$  was described in<sup>17</sup>), *Dorothy-Gal4* (*dot-Gal4*, originally described in<sup>19</sup>, *UAS-mCherry* (TRiP control line),  $dSparc^{M100329}$  (with a MiMIC insertion in the 5-prime region of the *dSparc* locus; described in<sup>20</sup>) and *Tub-Gal80<sup>ts</sup>* lines were all from the Bloomington Stock Centre (Bloomington, USA, IL). The *HandC-Gal4* (*Hand-Gal4*) line was described in<sup>21</sup>). The two RNAi lines for knocking-down *dKlf15* were from the Vienna Drosophila RNAi stock Centre (with a targeting hairpin inserted into the second chromosome, VDRC) and Bloomington ( $Klf15^{JF02420}$ , a Harvard TRiP line with a *dKlf15* targeting hairpin inserted into the third chromosome). All genetic combinations were generated by standard crosses. Generation of TARGET flies (*Hand-Gal4*; *Tub-Gal80<sup>ts</sup>*) was achieved by standard crosses<sup>22</sup>.

### Husbandry and propagation of flies

Flies were propagated routinely on a cornmeal-molasses diet at 25°C under a 12hr:12hr light-dark schedule. For TARGET experiments flies were reared at 18°C and then transferred to 29°C within 1-5 days of eclosing. Flies remained at 29°C for one to two weeks. Prior to analysis of heart function flies were transferred to 25°C for 24 hours. To reduce the effect of genetic background the  $dKlf15^{NN}$  mutant was backcrossed onto the  $w^{1118}$  for >20 generations.

### rtPCR

See supplemental methods.

### Imaging the adult heart

See supplemental methods file for more detailed description of the method (supplemental methods). Unless stated otherwise, 2-3 week old adult female flies were anaesthetised with

Flynap (Carolina Biological Supply Company, Burlington, NC, USA), dissected and hearts stained as described previously<sup>5, 23</sup>.

### **Analysis of adult heart function**

Two-three week old adult flies were anaesthetised with Flynap (Carolina Biological Supply Company, Burlington, NC, USA) and the beating adult heart in semi-intact preparations was visualised with an Ionoptix Myocam S high frame rate video camera (Ionoptix Ltd., Ireland) attached to a Zeiss AxioLab A1 with a water-dipping 10x objective. Approximately 15 seconds of video footage was collected using Micro-Manager open source microscopy software<sup>24</sup>, with a frame rate capture of between 120 and 150 frames per second. Videos were converted to audio video interleave (AVI) files using ImageJ and analysed using semi-automated optical heart analysis software<sup>25</sup>, [www.sohasoftware.com](http://www.sohasoftware.com); as previously described<sup>5</sup>. Quantified data are presented as the mean (+/-SEM) of at least 20 different flies per genotype.

### **Epifluorescence microscopy of adult fly tissues**

See supplemental methods.

### **Collection of hemolymph from adult flies**

One week old adult female flies were rendered immobile at 4°C for 5 minutes. To remove contaminating food and faeces flies were placed into a 1.5mL centrifuge tube and 500µL of 50% ice cold ethanol in water and the tube upturned several times. This step was repeated a further two times, first with 50% ethanol and then 50mM ammonium bicarbonate. Flies were then tipped onto an up-turned 30mm petri dish containing ice. The dorsal cuticle of the thorax of at least 100 flies was pricked with a 25G needle and then flies were collected into a centrifuge tube containing a 0.2 µm filter insert and 1 mL of 50 mM ammonium bicarbonate. Flies were centrifuged at 4°C for 10 seconds at 2000rpm. The filtrate was removed and replaced into the

upper filter cassette and centrifuged again. This step was repeated once more. The protein concentration of the filtrate was quantified by the Bradford assay using 50mM ammonium bicarbonate as a blank. Samples from flies that had not been pricked contained no protein. Samples contained 100 µg to 150 µg of total protein and were frozen at -20°C; volumes were adjusted with 50mM ammonium bicarbonate to normalise the total protein content between the samples. The mean spectral count of three independent biological replicates from the reference (*w<sup>1118</sup>*) and *dKlf15<sup>NN</sup>* mutant genotypes was used to infer protein abundance.

### **Proteomic and bioinformatics analysis of hemolymph proteome**

Hemolymph samples were lyophilised and resuspended in 200µL with 50 mM ammonium bicarbonate. Protein reduction was done by adding 4 µL of Tris(2-carboxyethyl)phosphine (TCEP) to 200 µL of samples at 60°C for 30 min. Iodoacetamide was added (to 20 mM) and proteins were alkylated at 30 min at room temperature in the dark. Mass spectrometry grade trypsin (Promega) was added (1:20 ratio) for overnight digestion at 37°C on thermo-mixer set on 700rpm. After digestion, formic acid was added to the peptide solution (to 2%), followed by desalting by Microtrap (Michrom-Bruker) and then on-line analysis of peptides by high-resolution, high-accuracy LC-MS/MS, consisting of a Michrom HPLC, an Agilent Zorbax C18 peptide trap, a 15-cm Michrom Magic C18 column, a low-flow ADVANCED Michrom MS source, and a LTQ-Orbitrap XL (Thermo Fisher Scientific). A 120 min gradient of 10–30%B (0.1% formic acid, 100% acetonitrile) was used to separate the peptides. The total LC time was 140 min. The LTQ-Orbitrap XL was set to scan precursors in the Orbitrap followed by data-dependent MS/MS of the top 10 precursors. The LC-MSMS raw data were submitted to Sorcerer Enterprise v.3.5 release (Sage-N Research Inc.) with SEQUEST algorithm as the search program for peptide/protein identification. SEQUEST was set up to search the target-decoy Swiss-Prot

*Drosophila melanogaster* fasta protein database indexed with trypsin for enzyme with the allowance of up to 2 missed cleavages, Semi Tryptic search and precursor mass tolerance of 50 ppm. The search results were viewed, sorted, filtered, and statically analyzed by using comprehensive proteomics data analysis software, Peptide/Protein prophet v.4.6.1 (ISB). The minimum trans-proteomic pipeline (TPP) protein probability score was set to 0.8-0.90, to assure very low error (much less than FDR 2%) with reasonably good sensitivity. The differential spectral count analysis was done by QTools, an open source in-house developed tool for automated differential peptide/protein spectral count analysis and Gene Ontology<sup>26</sup>. SignalP 4.1 was used to identify proteins having a signal peptide sequence in their N-terminus; default settings with a D cut-off of 0.45 were used<sup>27</sup>.

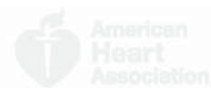

## Statistics

When more than two genotypes or treatments were used in an experiment one-way ANOVA was used to test the hypothesis that genotype may have affected heart function and post hoc test (Tukey's HSD) was used to establish *P* values between control and the different genotypes. An unpaired two-tailed student's t-Test was used to compare two means. GeneProf<sup>28</sup> was used to calculate the probability that hemolymph samples may be enriched with proteins predicted to have an N-terminal signal peptide versus a background dataset (the proportion of all known *Drosophila* genes predicted to encode for an N-terminal signal peptide).

## Results

### Genetic ablation of nephrocytes using *dKlf15* loss of function

It has recently been demonstrated that *dKlf15* is a nephrocyte-restricted transcription factor critical for the viability and differentiation of *Drosophila*'s two nephrocyte populations, the garland cells and pericardial nephrocytes<sup>17</sup>. In flies homozygous for a *dKlf15* loss of function



allele (*dKlf15<sup>NN</sup>*) the nephrocyte populations undergo attrition during late embryogenesis (garland cells, compare Fig. 1B' and B'') and the L3 stage of larval development, so that adults are completely devoid of nephrocytes (compare Fig. 1A' and A'').

### **Loss of nephrocyte *dKlf15* expression leads to cardiomyopathy**

It is increasingly clear that *Drosophila* heart function is modulated by non-cell autonomous mechanisms controlled by the neighbouring pericardial nephrocytes<sup>14, 15</sup>. To confirm that nephrocytes modulate cardiac function in the *Drosophila* model, adult hearts in wild-type and *dKlf15<sup>NN</sup>* mutants were monitored by videomicroscopy. Homozygous *dKlf15<sup>NN</sup>* mutant females (and hemizygous *dKlf15<sup>NN</sup>* mutant males) had significantly longer heart periods (the time between the initiation of successive cardiac contractions) compared to controls, primarily due to a significant lengthening of the diastolic interval (Fig. 2A and 2B; for data from males see below). The mutants also had a modest increase in the arrhythmicity index (AI; Fig. 2B), a measure of the heart's beat-to-beat variability. Additionally, end diastolic and end systolic diameters (EDD, ESD) were greater in mutants than in controls; however this was not associated with a change in fractional shortening (the ratio of EDD to ESD – the relative distance that the heart wall travels during a contraction). To establish if the heart phenotype was due to the specific loss of nephrocyte *dKlf15* expression, *dKlf15* was silenced specifically in nephrocytes using *dorothy-Gal4*. Knock down of *dKlf15* in nephrocytes led to a heart phenotype that was almost identical to that of the *dKlf15<sup>NN</sup>* mutants; however the AI, although trending towards being increased, was not statistically different from that of the controls (Fig. 2B).

### **Nephrocytes mediate normal cardiac function in adults**

There is doubt as to whether normal heart function in adult flies is dependent or not on sustained interactions between cardiomyocytes and nephrocytes. Sustained *dKlf15* expression is required

for adult nephrocyte function<sup>17</sup>, so to establish if nephrocytes were required for normal cardiac function in adult flies the TARGET system<sup>22</sup> was used to silence *dKlf15* in the nephrocytes of adult flies (Fig. 3). Using this system it was possible to allow functional nephrocytes to develop normally and then silence *dKlf15* in adults to cause nephrocyte dysfunction. Accordingly, nephrocytes dedifferentiated (showed reduced Amnionless protein expression) and lost their ability to accumulate dextran. In association with this, the flies developed a cardiomyopathy which recapitulated that seen in the *dKlf15<sup>NN</sup>* mutants as well as *dorothy-Gal4* driven *dKlf15* silencing experiments (Fig. 3B).

### **Reduction of nephrocyte *Amnionless* expression is associated with cardiomyopathy**

Amnionless is crucial for nephrocyte function<sup>29</sup>, so it was hypothesised that loss of *Amnionless* may be sufficient to cause cardiomyopathy. Silencing *Amnionless* in nephrocytes did not cause nephrocyte death but did impair nephrocyte endocytic function (Fig. 4A & B). Importantly, silencing *Amnionless* impacted cardiac function by increasing the heart period due to a lengthening of the diastolic interval (Fig. 4C), similar to the phenotype in *dKlf15* loss-of-function experiments.

### **Disruption of the hemolymph proteome in *dKlf15* loss of function flies**

Given that disruption of nephrocyte endocytosis was associated with the development of cardiomyopathy it was hypothesised that nephrocytes may regulate levels of circulating, cardiomodulatory signals. We therefore examined the hemolymph proteome of control and *dKlf15<sup>NN</sup>* mutants using a method similar to that used by others to identify over 700 larval hemolymph peptides<sup>30</sup>. Signals corresponding to 495 different proteins were identified. Of these, 209 were identified in the hemolymph of both genotypes, 192 were identified only in the control strain and 94 were found only in *dKlf15<sup>NN</sup>* mutants (Fig. 5A).

Proteins were allocated to five non-overlapping groups (see Table S1); (group 1) unique to *dKlf15<sup>NN</sup>* mutants; (group 2) increased at least 2-fold in *dKlf15<sup>NN</sup>* mutants; (group 3) present in both genotypes and within 0.8-2 fold different in mutants relative to controls; (group 4) reduced by more than 0.8 fold in the mutants relative to controls and (group 5) unique to controls.

It was predicted that ablation of the nephrocytes would lead to the accumulation of secreted proteins in circulation. To address this possibility, the SignalP 4.1 informatics tool was used to identify proteins predicted to have a signal peptide in their N-terminal region, a sequence associated with transport to the extracellular space<sup>27</sup>. Of the 448 proteins identified in the circulation of the reference strain, 39% were predicted to contain an N-terminal signal peptide (Fig. 5B). In contrast, the hemolymph of the nephrocyte-free mutants was enriched for proteins predicted to contain a signal peptide (81%). In comparison to the total number of *Drosophila* genes predicted to encode signal peptides (3173 out of 17559 known genes, 18%) it was established that hemolymph proteome is enriched for proteins with signal peptides (P-value =3.827e-30) and that in the absence of nephrocytes there is further enrichment for proteins with signal peptides, compared to wild type hemolymph (P-value =7.408e-35). These data are consistent with nephrocytes having a broad impact on the circulating proteome and suggest that loss of nephrocyte function causes the accumulation in the circulation of a large subset of secreted proteins.

Of the proteins found only in the *dKlf15<sup>NN</sup>* mutants (group 1), the most abundant signals were for the matricellular protein BM-40-SPARC (an ortholog of mammalian Secreted Protein Acidic and Rich in Cysteine (SPARC; Fig 5C & D and Fig 6A)<sup>31</sup>) and the cell adhesion protein DE-cadherin (encoded by *shotgun*, *shg*). Analysis of the SPARC peptide peak areas confirmed the absence of SPARC in the wild type hemolymph (supplemental figure S1). Proteins

significantly up-regulated in the hemolymph of *dKlf15<sup>NN</sup>* mutants compared to wild type flies (group 2; Fig 6B) included three genes with unknown functions (CG18067, CG15293 and CG14961; up-regulated 27, 9 and 8.5-fold respectively;  $P < 0.05$ ) as well as several proteins involved in immunity and clotting (Gelsolin, Immune induced peptides 10 and 23 and the Defence protein I(2)34F;  $P < 0.05$ ). The immune modulatory serpin necrotic<sup>1</sup>, trended towards a 3-fold accumulation in the mutants' hemolymph.

Of the proteins common to both genotypes and at similar levels (group 3, Fig 6C), the largest spectral counts corresponded to the lipophorin, Retinoid-and fatty acid-binding glycoprotein (*Rfabg*; spectral count of 2260 +/-785 and 2097 +/-570 for wild type and mutant hemolymph;  $P = 0.88$ ) and the yolk proteins / vitellogenins (VIT1, 2 and 3). Proteins with large spectral counts in the wild types that were significantly down-regulated in the mutants hemolymph (group 4; Fig 6D) included several intracellular cytoskeletal and metabolic proteins (Aldolase, enolase and subunits of glyceraldehyde phosphate dehydrogenase enzyme). Finally, proteins unique to wild type hemolymph (group 5, Fig 6E) included Peroxiredoxin 5 (*Prdx5*; spectral count of 16 +/-4 in wild type and 2 +/-1 in the mutant,  $P < 0.05$ ), Iron regulatory protein 1B (*Irp1B*; spectral count of 22 +/-6 in wild type and 4 +/-1 in mutant,  $P < 0.05$ ) and Vacuolar H<sup>+</sup> ATPase 68 kDa subunit 2A (*Vha68-2*; spectral count of 13 +/-2 in wild type, undetected in the mutant,  $P < 0.05$ ).

#### **A *dSparc*<sup>M100329</sup> mutation corrects the cardiomyopathy in *dKlf15<sup>NN</sup>* mutants**

Of the proteins unique to the *dKlf15<sup>NN</sup>* mutants' hemolymph SPARC was notable because of its role in collagen deposition and several growth factor signalling pathways thought to affect cardiac function<sup>32, 33</sup>. We therefore tested whether *SPARC* contributed to the observed cardiomyopathy. We obtained a recessive lethal *Drosophila SPARC* allele (*dSparc*<sup>M100329</sup>) caused

by the insertion of a 7.3kb MiMIC transposon in the 5 prime untranscribed region of the *dSparc* open reading frame<sup>20</sup>. Homozygous adults do not develop, however *dSparc*<sup>M100329</sup> heterozygotes are viable, fertile and develop to adulthood, albeit with *dSparc* gene expression reduced by 60% (Fig. 7A). Homozygous *dKlf15*<sup>NN</sup> mutant females were crossed with males carrying the *dSparc*<sup>M100329</sup> allele and then the heart function of male progeny (i.e. those hemizygous for *dKlf15*<sup>NN</sup> and heterozygous for the *dSparc*<sup>M100329</sup> allele) was analysed. It was found that the *dKlf15*<sup>NN</sup> mutant males had no nephrocytes and exhibited cardiomyopathy characterised by long diastolic intervals, similar to the phenotype of homozygous *dKlf15*<sup>NN</sup> mutant females (cf Fig. 2 and 6). On the other hand, heart function parameters in *dSparc*<sup>M100329</sup> heterozygotes (*w*<sup>1118</sup>; *dSparc*<sup>M100329</sup>) were not different from those of control *w*<sup>1118</sup> flies and specifically there was no increase in heart period/diastolic intervals as observed for hearts from hemizygous *dKlf15*<sup>NN</sup> mutants (Fig. 7B). In contrast, when *Sparc* was silenced in wild-type cardiomyocytes, there was a significant impact on heart function (supplemental figure 2). Importantly, reducing *dSparc* expression rescued the abnormal heart phenotype in hemizygous *dKlf15*<sup>NN</sup> mutants ((*dKlf15*<sup>NN</sup>; *dSparc*<sup>M100329+/-</sup>) Fig. 7B), despite these flies having no nephrocytes. The findings demonstrate that heterozygosity for *SPARC* leading to reduced gene expression has no direct impact on cardiac function in the wild type flies, whereas it ameliorates the cardiomyopathy caused by *Klf15* induced loss of nephrocytes.

## Discussion

The *Drosophila* heart model represents a highly tractable genetic system with which to study mammalian cardiac physiology. Whilst at an anatomical level the links between fly nephrocytes and cardiomyocytes may not be evolutionarily conserved, the high degree of gene conservation supports the use of this model for the identification of genetic pathways underlying human heart

function. We used both proteomics and genetics to identify SPARC as an important component of cardiac function in *Drosophila*, highlighting the possibility that SPARC's role in the heart may be evolutionarily conserved from flies to humans. By using a cell-specific and temporally-conditional nephrocyte loss of function paradigm, we establish that pericardial nephrocytes sustain normal heart function in adult *Drosophila*. Importantly, it was shown that nephrocytes prevent the development of a SPARC-dependent cardiomyopathy, a finding of considerable importance because SPARC is emerging as a clinically important target for the control of tissue fibrosis in humans<sup>33,34</sup>. Collectively, these findings highlight the importance of the *Drosophila* heart model as a means of identifying and studying cardiomodulatory signals of relevance to human cardiac function and suggest that changes to SPARC in humans may contribute to cardiac dysfunction in disease and ageing.

Our data reaffirm that pericardial nephrocytes mediate non-cell autonomous mechanisms controlling *Drosophila* heart function. The findings also suggest that the changes in heart morphology and the increased arrhythmias seen in *dKlf15<sup>NN</sup>* mutants were due not only to interactions between the cardiomyocytes and nephrocytes during pre-adult stages but also that adult heart rate is mediated by an on-going interaction between the cardiomyocytes and nephrocytes. Thus, it can be concluded that loss of nephrocytes or nephrocyte function both developmentally or acutely in adults, leads to cardiac dysfunction. Our data also suggest that the cardiomyopathy caused by loss of nephrocytes or nephrocyte function is linked to the nephrocytes' role in peripheral clearance.

To our knowledge, our dataset represents the first examination of the adult *Drosophila* hemolymph proteome. The most abundant protein in the hemolymph of both wild type and *dKlf15<sup>NN</sup>* mutants was Retinoid-and fatty acid-binding glycoprotein (Rfabg). Rfabg is lipid

transporter found in insect hemolymph and known to be required for Hedgehog and Wingless signalling<sup>35</sup>. There were also large signals for several important intracellular metabolic proteins (e.g. Aldolase, enolase and subunits of the glyceraldehyde phosphate dehydrogenase enzyme). The presence of intracellular proteins is a feature of the human plasma proteome, suggesting that intracellular proteins are a constituent of circulating fluids in animals. We also recorded an expected absence or near-absence from the adult hemolymph of the Larval Serum Proteins LSP1 $\alpha$ , LSP1 $\beta$ , LSP1 $\gamma$  and LSP2, all of which are amongst the most highly represented proteins in larval hemolymph<sup>30</sup>. The LSPs are metabolised during the non-feeding third instar and pupal stages, hence our data indicate that by the 1st week of adulthood they are difficult to detect in the hemolymph.

In addition, there were proteins identified in both genotypes, which were significantly up or down-regulated in the hemolymph of *dKlf15<sup>NN</sup>* mutants (Group 2). The most highly up-regulated signals were ascribed to genes with unknown functions (CG18067, CG15293 and CG14961) and proteins involved in immunity and clotting (Gelsolin, Immune induced peptides 10 and 23 and the Defence protein l(2)34F). Although not reaching statistical significance, necrotic, an immune modulatory serpin removed from circulation by nephrocytes<sup>1</sup>, trended towards accumulating in the mutants' hemolymph of the mutants. In addition, there was a significant reduction in the mutants' hemolymph of Peroxiredoxin 5, an antioxidant that also negatively regulates the immune response<sup>36</sup>. Collectively, these findings suggest that the mutant flies may have modified immune responses and this is currently under investigation.

The most abundant proteins identified only in the hemolymph of the *dKlf15<sup>NN</sup>* mutants were DE-Cadherin and SPARC. DE-Cadherin mediates cell adhesion and is critical for embryonic development and is present in the medulla of the lymph gland<sup>37</sup>, whereas SPARC

stabilises basal lamina by interacting with collagen IV, an interaction critical for normal development<sup>38, 39</sup>. In contrast, the role of SPARC in post-embryonic and adult *Drosophila* remains unclear. Mammalian SPARC directly binds to collagen as well as growth factors (reviewed in<sup>40</sup>), and is associated with a diverse range of pathologies including the maintenance of cardiac integrity<sup>41</sup> and metabolic syndrome<sup>42</sup>. Our data indicate that a SPARC-dependent cardiomyopathy is prevented in the *Drosophila* model via a nephrocyte-mediated clearance mechanism. Peripheral clearance of macromolecules is fundamentally important to tissue homeostasis but difficult to study in mammals. Although few studies exist, it is interesting to note that disruption of peripheral clearance by liver sinusoidal cells in stabilin-1 and stabilin-2 knock-out mice led to local and systemic tissue fibrosis, albeit without an increase in circulating SPARC levels being detected<sup>43</sup>. It remains to be verified whether the increased SPARC levels directly cause cardiomyopathy or whether it is due to other hemolymph factors that are increased in *dKlf15<sup>NN</sup>* mutants that act via a SPARC-dependent pathway.

Although abnormal cardiomyocyte function in *dKlf15<sup>NN</sup>* mutants could be rescued by reducing *SPARC* gene dosage, we could not confirm whether this was an effect of reduced *SPARC* expression in the cardiomyocytes, because *SPARC* knock-down in wild type cardiomyocytes led to a severe cardiomyopathy, characterised by reduced fractional shortening (supplemental figure 2). Hence, rescue of the cardiomyopathy by reducing *SPARC* gene dosage in the nephrocyte-free *dKlf15<sup>NN</sup>* mutants may have been due either to a less severe reduction in *SPARC* expression in the cardiomyocytes and / or reduced *SPARC* expression in cells other than cardiomyocytes. Interestingly, moderate reductions in *ILK* expression in whole flies can extend lifespan and retard cardiac ageing, yet strong knock down in cardiomyocytes has a profound negative impact on cardiac function<sup>8</sup>. Thus, different phenotypes can develop in the heart as a



consequence of differing levels of gene silencing / gene dosage.

In summary, the *Drosophila* heart can develop a *SPARC*-dependent cardiomyopathy as a result of nephrocyte loss. These findings identify *Drosophila* as a highly tractable model system with which to study the important relationship between tissue homeostasis and peripheral clearance, especially as it relates to human cardiac physiology. The next step will therefore be to establish how *SPARC* contributes to cardiac function in *Drosophila* and explore whether these mechanisms are conserved and relevant to the human heart.

**Acknowledgments:** PSH acknowledges support of the BHF CoRE award (RE/08/001). PSH is especially grateful to Dr. Georg Vogler and Ms. Hanah Catan (Sanford Burnham Medical Research Institute); Dr. Richard Marley and Ms. Ashleigh Cheyne (University of Edinburgh) for comments and assistance with experiments. We thank the TRiP at Harvard Medical School (NIH/NIGMS R01-GM084947) for providing transgenic RNAi fly stocks used in this study.

**Funding Sources:** PSH is supported by a British Heart Foundation Intermediate Basic Science Fellowship (FS/13/17/29905). This work was also supported by a British Heart Foundation Centre of Research Excellence (CoRE) award to the University of Edinburgh and by a subsistence grant from the Scottish Universities Life Science Alliance (SULSA) to PSH. This work was also supported by grants from the National Institutes of Health to RB. KO is supported by American Heart Association award 0835243N.

**Conflict of Interest Disclosures:** None.

#### References:

1. Soukup SF, Culi J, Gubb D. Uptake of the necrotic serpin in *Drosophila melanogaster* via the lipophorin receptor-1. *PLoS Genet.* 2009;5:e1000532.
2. Das D, Aradhya R, Ashoka D, Inamdar M. Macromolecular uptake in *Drosophila* pericardial cells requires *rudhira* function. *Exp Cell Res.* 2008;314:1804-1810.

3. Mills RP, King RC. The pericardial cells of drosophila melanogaster. *Q J Microsc Sci.* 1965;106:261-268.
4. Neely GG, Kuba K, Cammarato A, Isobe K, Amann S, Zhang L, et al. A global in vivo drosophila rna screen identifies not3 as a conserved regulator of heart function. *Cell.* 2010;141:142-153.
5. Catterson JH, Heck MM, Hartley PS. Fermitins, the orthologs of mammalian kindlins, regulate the development of a functional cardiac syncytium in drosophila melanogaster. *PLoS One.* 2013;8:e62958.
6. Viswanathan MC, Kaushik G, Engler AJ, Lehman W, Cammarato A. A drosophila melanogaster model of diastolic dysfunction and cardiomyopathy based on impaired troponin-t function. *Circ Res.* 2014;114:e6-17.
7. Wessells RJ, Fitzgerald E, Cypser JR, Tatar M, Bodmer R. Insulin regulation of heart function in aging fruit flies. *Nat Genet.* 2004;36:1275-1281.
8. Nishimura M, Kumsta C, Kaushik G, Diop SB, Ding Y, Bisharat-Kernizan J, et al. A dual role for integrin-linked kinase and beta1-integrin in modulating cardiac aging. *Aging Cell.* 2014;13:431-440.
9. Birse RT, Choi J, Reardon K, Rodriguez J, Graham S, Diop S, et al. High-fat-diet-induced obesity and heart dysfunction are regulated by the tor pathway in drosophila. *Cell Metab.* 2010;12:533-544.
10. Na J, Musselman LP, Pendse J, Baranski TJ, Bodmer R, Ocorr K, et al. A drosophila model of high sugar diet-induced cardiomyopathy. *PLoS Genet.* 2013;9:e1003175.
11. Na J, Sweetwyne MT, Park AS, Susztak K, Cagan RL. Diet-induced podocyte dysfunction in drosophila and mammals. *Cell Rep.* 2015;12:636-647.
12. Buechling T, Akasaka T, Vogler G, Ruiz-Lozano P, Ocorr K, Bodmer R. Non-autonomous modulation of heart rhythm, contractility and morphology in adult fruit flies. *Dev Biol.* 2009;328:483-492.
13. Fujioka M, Wessells RJ, Han Z, Liu J, Fitzgerald K, Yusibova GL, et al. Embryonic even skipped-dependent muscle and heart cell fates are required for normal adult activity, heart function, and lifespan. *Circ Res.* 2005;97:1108-1114.
14. Johnson AN, Burnett LA, Sellin J, Paululat A, Newfeld SJ. Defective decapentaplegic signaling results in heart overgrowth and reduced cardiac output in drosophila. *Genetics.* 2007;176:1609-1624.
15. Lim HY, Wang W, Chen J, Ocorr K, Bodmer R. Ros regulate cardiac function via a distinct paracrine mechanism. *Cell Rep.* 2014;7:35-44.

16. Das D, Aradhya R, Ashoka D, Inamdar M. Post-embryonic pericardial cells of drosophila are required for overcoming toxic stress but not for cardiac function or adult development. *Cell Tissue Res.* 2008;331:565-570.
17. Ivy JR, Drechsler M, Catterson JH, Bodmer R, Ocorr K, Paululat A, et al. Klf15 is critical for the development and differentiation of drosophila nephrocytes. *PLoS One.* 2015;10:e0134620.
18. Frangogiannis NG. Matricellular proteins in cardiac adaptation and disease. *Physiol Rev.* 2012;92:635-688.
19. Kimbrell DA, Hice C, Bolduc C, Kleinhesselink K, Beckingham K. The dorothy enhancer has tinman binding sites and drives hopscotch-induced tumor formation. *Genesis.* 2002;34:23-28.
20. Venken KJ, Schulze KL, Haelterman NA, Pan H, He Y, Evans-Holm M, et al. Mimic: A highly versatile transposon insertion resource for engineering drosophila melanogaster genes. *Nat Methods.* 2011;8:737-743.
21. Sellin J, Albrecht S, Kolsch V, Paululat A. Dynamics of heart differentiation, visualized utilizing heart enhancer elements of the drosophila melanogaster bhlh transcription factor hand. *Gene Expr Patterns.* 2006;6:360-375.
22. McGuire SE, Mao Z, Davis RL. Spatiotemporal gene expression targeting with the target and gene-switch systems in drosophila. *Sci STKE.* 2004;2004:pl6.
23. Park SK, Venable JD, Xu T, Yates JR. A quantitative analysis software tool for mass spectrometry-based proteomics. *Nat Methods.* 2008;5:319-322.
24. Edelstein A, Amodaj N, Hoover K, Vale R, Stuurman N. Computer control of microscopes using µmanager. John Wiley & Sons, Inc.; 2010.
25. Ocorr K, Reeves NL, Wessells RJ, Fink M, Chen HS, Akasaka T, et al. Kcnq potassium channel mutations cause cardiac arrhythmias in drosophila that mimic the effects of aging. *Proc Natl Acad Sci U S A.* 2007;104:3943-3948.
26. Brill LM, Motamedchaboki K, Wu S, Wolf DA. Comprehensive proteomic analysis of schizosaccharomyces pombe by two-dimensional hplc-tandem mass spectrometry. *Methods.* 2009;48:311-319.
27. Petersen TN, Brunak S, von Heijne G, Nielsen H. Signalp 4.0: Discriminating signal peptides from transmembrane regions. *Nat Methods.* 2011;8:785-786.
28. Halbritter F, Vaidya HJ, Tomlinson SR. Geneprof: Analysis of high-throughput sequencing experiments. *Nat Methods.* 2012;9:7-8.

29. Zhang F, Zhao Y, Chao Y, Muir K, Han Z. Cubilin and amnionless mediate protein reabsorption in drosophila nephrocytes. *J Am Soc Nephrol*. 2013;24:209-216.
30. Handke B, Poernbacher I, Goetze S, Ahrens CH, Omasits U, Marty F, et al. The hemolymph proteome of fed and starved drosophila larvae. *PLoS One*. 2013;8:e67208.
31. Maurer P, Hohenadl C, Hohenester E, Gohring W, Timpl R, Engel J. The c-terminal portion of bm-40 (sparc/osteonectin) is an autonomously folding and crystallisable domain that binds calcium and collagen iv. *J Mol Biol*. 1995;253:347-357.
32. de Castro Bras LE, Toba H, Baicu CF, Zile MR, Weintraub ST, Lindsey ML, et al. Age and sparc change the extracellular matrix composition of the left ventricle. *Biomed Res Int*. 2014;2014:810562.
33. Kos K, Wilding JP. Sparc: A key player in the pathologies associated with obesity and diabetes. *Nat Rev Endocrinol*. 2010;6:225-235.
34. Trombetta-Esilva J, Bradshaw AD. The function of sparc as a mediator of fibrosis. *Open Rheumatol J*. 2012;6:146-155.
35. Panakova D, Sprong H, Marois E, Thiele C, Eaton S. Lipoprotein particles are required for hedgehog and wingless signalling. *Nature*. 2005;435:58-65.
36. Radyuk SN, Michalak K, Klichko VI, Benes J, Orr WC. Peroxiredoxin 5 modulates immune response in drosophila. *Biochim Biophys Acta*. 2010;1800:1153-1163.
37. Jung SH, Evans CJ, Uemura C, Banerjee U. The drosophila lymph gland as a developmental model of hematopoiesis. *Development*. 2005;132:2521-2533.
38. Martinek N, Shahab J, Saathoff M, Ringuette M. Haemocyte-derived sparc is required for collagen-iv-dependent stability of basal laminae in drosophila embryos. *J Cell Sci*. 2008;121:1671-1680.
39. Pastor-Pareja JC, Xu T. Shaping cells and organs in drosophila by opposing roles of fat body-secreted collagen iv and perlecan. *Dev Cell*. 2011;21:245-256.
40. Bradshaw AD. Diverse biological functions of the sparc family of proteins. *Int J Biochem Cell Biol*. 2012;44:480-488.
41. Schellings MW, Vanhoutte D, Swinnen M, Cleutjens JP, Debets J, van Leeuwen RE, et al. Absence of sparc results in increased cardiac rupture and dysfunction after acute myocardial infarction. *J Exp Med*. 2009;206:113-123.
42. Tartare-Deckert S, Chavey C, Monthouel MN, Gautier N, Van Obberghen E. The matricellular protein sparc/osteonectin as a newly identified factor up-regulated in obesity. *J Biol Chem*. 2001;276:22231-22237.

43. Schledzewski K, Geraud C, Arnold B, Wang S, Grone HJ, Kempf T, et al. Deficiency of liver sinusoidal scavenger receptors stabilin-1 and -2 in mice causes glomerulofibrotic nephropathy via impaired hepatic clearance of noxious blood factors. *J Clin Invest*. 2011;121:703-714.

### Figure Legends:

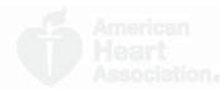

**Figure 1:** Loss of pericardial nephrocytes and garland cells in *dKlf15<sup>NN</sup>* mutants. (A) Adult control (*w<sup>1118</sup>*; A') and *dKlf15<sup>NN</sup>* mutant flies (A'') were dissected and the heart fixed and stained with phalloidin to visualise the heart's actin cytoskeleton and antibodies to the pericardial nephrocyte marker Amnionless (*CG11592*). All pericardial nephrocytes fail to differentiate in the mutants, undergoing attrition during late larval development so that by adulthood there are none. (B) Third instar larvae were dissected and the garland cells visualised after staining with Hoechst. In control flies (*w<sup>1118</sup>*; B') garland cells (GCs) are binucleate and situated at the interface between the proventriculus (PV) and oesophagus (OE). In contrast, the garland cells fail to develop normally and are lost in the *dKlf15<sup>NN</sup>* mutants (B''). Scale bar = 100  $\mu$ m.

**Figure 2:** Loss of nephrocytes leads to cardiomyopathy. (A) M-mode records of adult hearts. Regular contractions can be seen in wild type (*dKlf15<sup>+/+</sup>*), *dKlf15<sup>+/NN</sup>* heterozygote and *dot-Gal4* outcrossed once to the *w<sup>1118</sup>* control line (*dot-Gal4 x w<sup>1118</sup>*); whereas flies homozygous for the

*dKlf15<sup>NN</sup>* allele, or in which *dKlf15* has been silenced in nephrocytes (*dot-Gal4; UAS-dKlf15<sup>RNAi</sup>*), there is an abnormally long diastolic interval and periods of arrhythmia. **(B)** Adult heart function. EDD = end diastolic diameter; ESD = end systolic diameter; *ns* = not statistically different from *dKlf15<sup>+/+</sup>* or *dot > w<sup>1118</sup>* control; \* = P<0.01 compared to *dKlf15<sup>+/+</sup>*; † = P<0.01 compared to *dot > w<sup>1118</sup>*); *n* = 41-45 flies per genotype.

**Figure 3:** Conditional loss of nephrocyte function in adults leads to cardiomyopathy. *dKlf15* was conditionally silenced in the adult fly heart using the temperature-sensitive TARGET system driven by *Hand-Gal4*. Gene silencing is prevented at 18°C but permitted at higher temperatures (29°C). Flies were reared at 18°C until they eclosed and then maintained at this temperature to prevent gene silencing or moved to the higher temperature to allow *dKlf15* silencing. The *Hand-TARGET* parent line crossed to *w<sup>1118</sup>* line or *UAS-mCherry* were used as controls. **(A)** The endocytic function (ability to take-up fluorescently labelled dextran) was used to assess nephrocyte function. At the non-permissive temperature nephrocytes in all genotypes were able to accumulate dextran. When shifted to the permissive temperature the nephrocytes in control flies were still able to accumulate dextran but flies in which *dKlf15* had been silenced could not. **(B)** Quantification of heart function in adult flies reared at 18°C until eclosion and then transferred to 29°C for two weeks. The beating heart was imaged in semi-intact preparations using high frame rate videomicroscopy. *n* = 20 for each genotype. EDD = end diastolic interval; ESD = end systolic diameter. *ns* = not significantly different from Target or *w<sup>1118</sup>*; \* and † = P<0.01 compared to Target, *w<sup>1118</sup>* or Target; UAS mCherry controls, respectively.

**Figure 4:** Loss of Amnionless function in nephrocytes leads to cardiomyopathy. (A) *Amnionless* was silenced in nephrocytes using *dot-Gal4*. As a negative control, the parent driver line was outcrossed once to the  $w^{1118}$  line (*dot-Gal4 x w<sup>1118</sup>*) and offspring analysed. Micrographs show adult hearts stained with anti-Amnionless antibodies (green) and phalloidin (red). Amnionless protein was localised to nephrocytes in controls (A') whereas silencing led to reduction in its detection but not the loss of pericardial nephrocytes (A''); arrow indicates a pericardial nephrocyte); HT = Heart tube. (B) Semi-intact heart preparations were incubated with fluorescently-tagged 10kDa dextran (green) and wheat germ agglutinin (red) for 30 minutes, washed and imaged. Arrows indicate nephrocytes. Dextran accumulated in controls (B') but not in *Amnionless*-silenced nephrocytes (B''). WGA = wheat germ agglutinin. (C) Quantification of heart function in flies with *dAmnionless* silenced nephrocytes. Hearts were analysed by high frame rate videomicroscopy of semi-intact adult heart preparations. EDD = end diastolic interval; ESD = end systolic diameter; EDD/ESD = fractional shortening of the heart contraction; *ns* = not statistically different from control genotype (*dot-Gal4 x w<sup>1118</sup>*); \* $P < 0.01$ , †\* $< 0.05$ ;  $n = 18-20$  per genotype.

**Figure 5:** Proteomic analysis of adult *Drosophila* hemolymph. Hemolymph was collected from adult flies and the proteome analysed. (A) Number of different proteins identified in the hemolymph of adult control ( $w^{1118}$ ) and mutant *dKlf15<sup>NN</sup>* flies. (B) The number of proteins predicted to have a signal peptide by SignalP 4.1. (C) Heat map showing a truncated list of proteins identified only in the hemolymph of *dKlf15<sup>NN</sup>* mutants. Proteins are rank-ordered according to spectral count; each row represents three independent samples from each genotype

(for full details see Table S1). (D) Coverage of SPARC protein sequence by detected peptides (yellow corresponds to regions detected in proteomics).

**Figure 6:** Mean spectral counts of hemolymph proteins. (A) Counts for two most abundant proteins found only in the *dKlf15<sup>NN</sup>* mutants hemolymph. (B) Proteins showing an increase in the mutant's hemolymph. (C) The most abundant proteins in the hemolymph of wild type and *dKlf15<sup>NN</sup>* mutants. (D) Proteins significantly reduced in the hemolymph of the *dKlf15<sup>NN</sup>* mutants. (E) Proteins showing the largest, statistically significant, decrease in the mutant's hemolymph. *n* = 3 independent hemolymph samples from ~100 flies of each genotype; \**P*<0.05, ns = no significant difference.

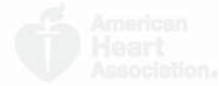

**Figure 7:** SPARC mediates cardiomyopathy in *dKlf15<sup>NN</sup>* mutants. The heart function of two week old male flies of different genotypes was analysed in semi-intact fly preparations using high frame rate videomicroscopy. Quantified data for several parameters are presented. EDD = End diastolic diameter; ESD = End systolic diameter. \* = different from *w<sup>1118</sup>* (*P*<0.01); † = not different from *w<sup>1118</sup>* (*P*>0.05); ‡ = different from *dKlf15<sup>NN</sup>* (*P*<0.01); § = not different from *w<sup>1118</sup>*; ¶ = different from *dSparc<sup>M100329</sup>* (*P*>0.05); ¶ = not different from *dKlf15<sup>NN</sup>* (*P*>0.05); ns = not different from *w<sup>1118</sup>* (*P*>0.05). *n* = 40-69 flies per genotype.



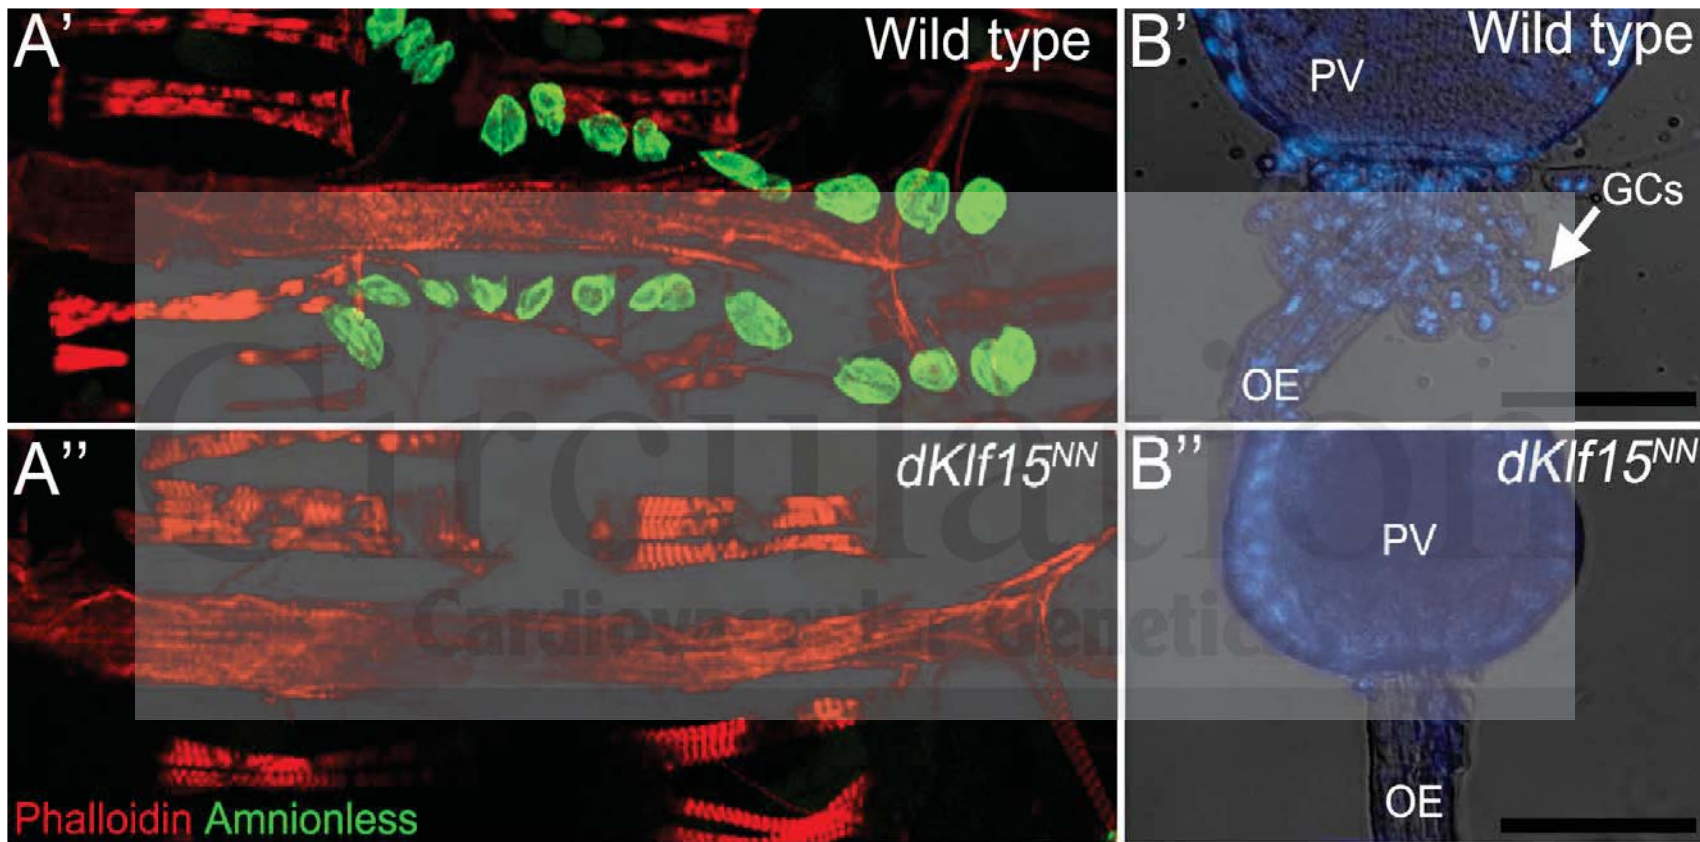

A *dKif15<sup>+/+</sup>*

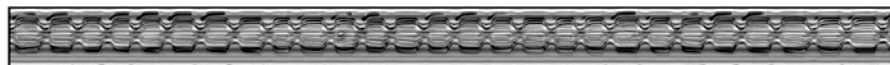

*dKif15<sup>+/NN</sup>*

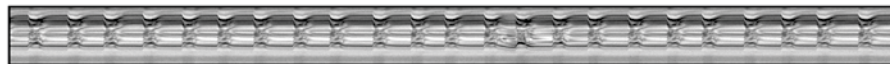

*dKif15<sup>NN/NN</sup>*

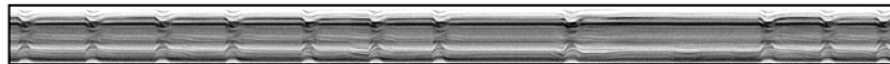

*dot-Gal4 x w<sup>1118</sup>*

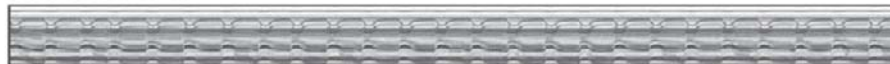

*dot-Gal4;UAS-dKif15<sup>RNAi</sup>*

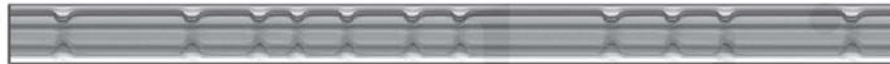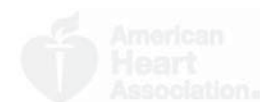

B

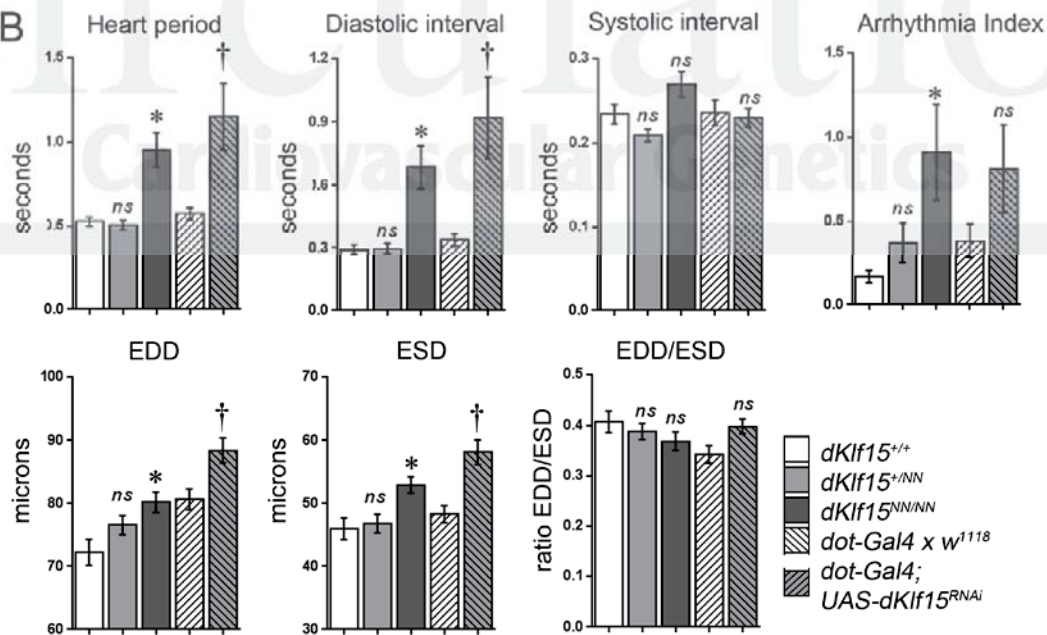

Circulation  
Cardiovascular Genetics

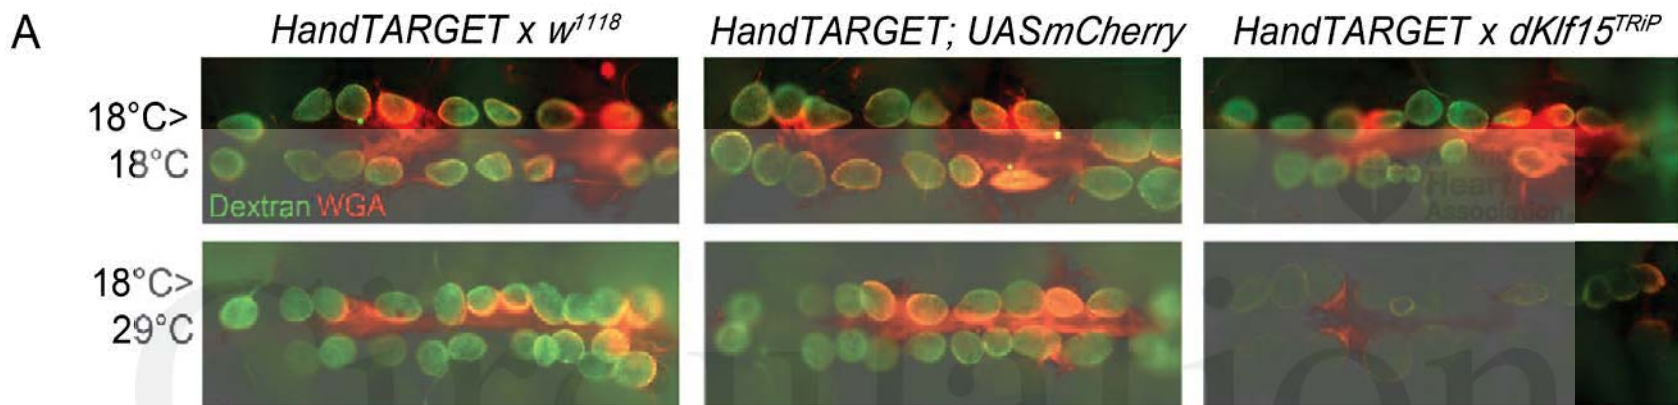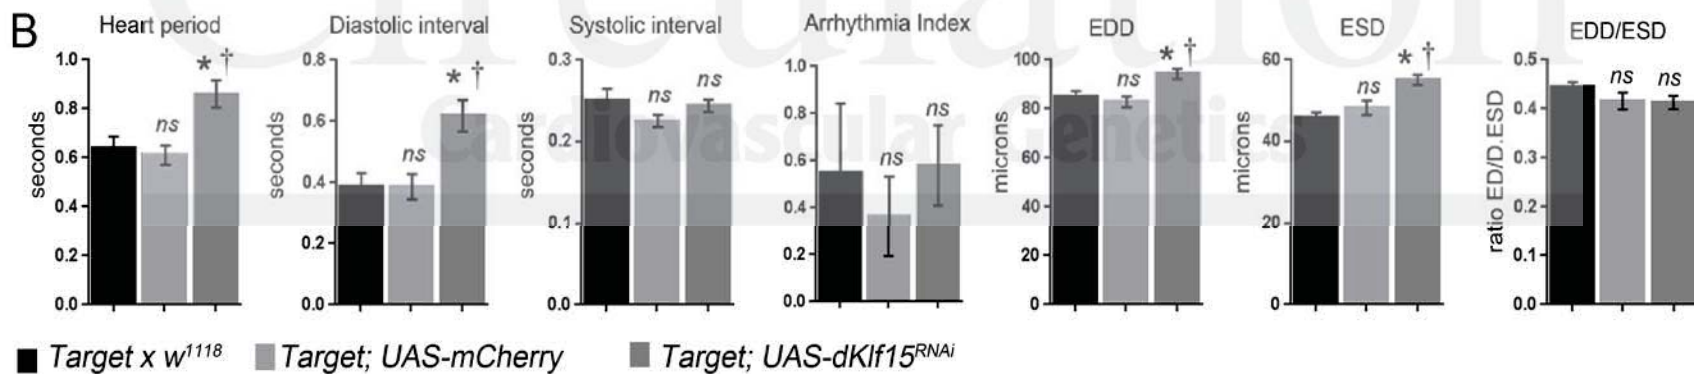

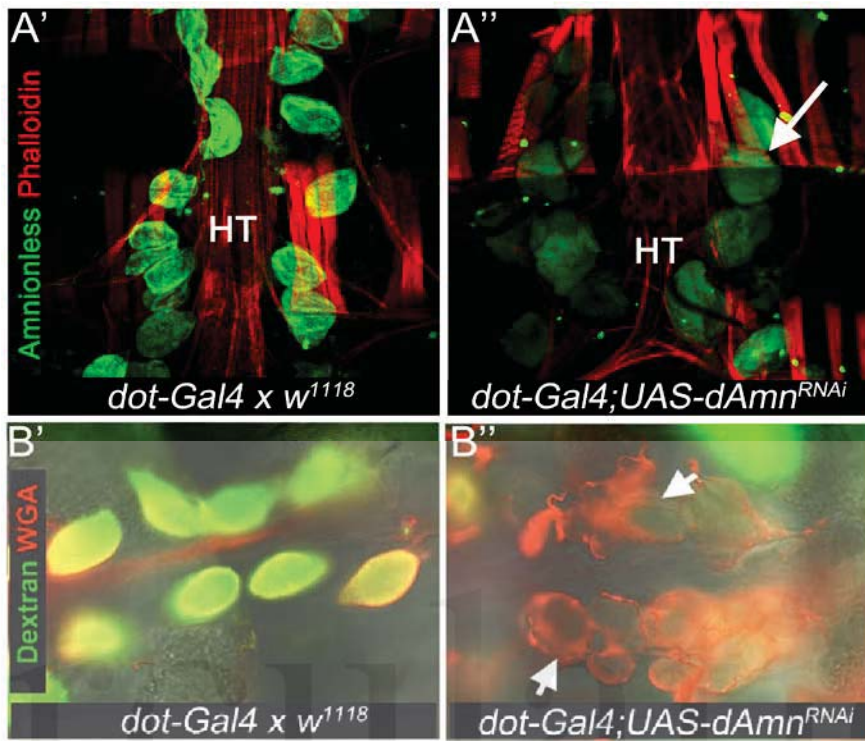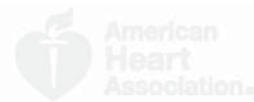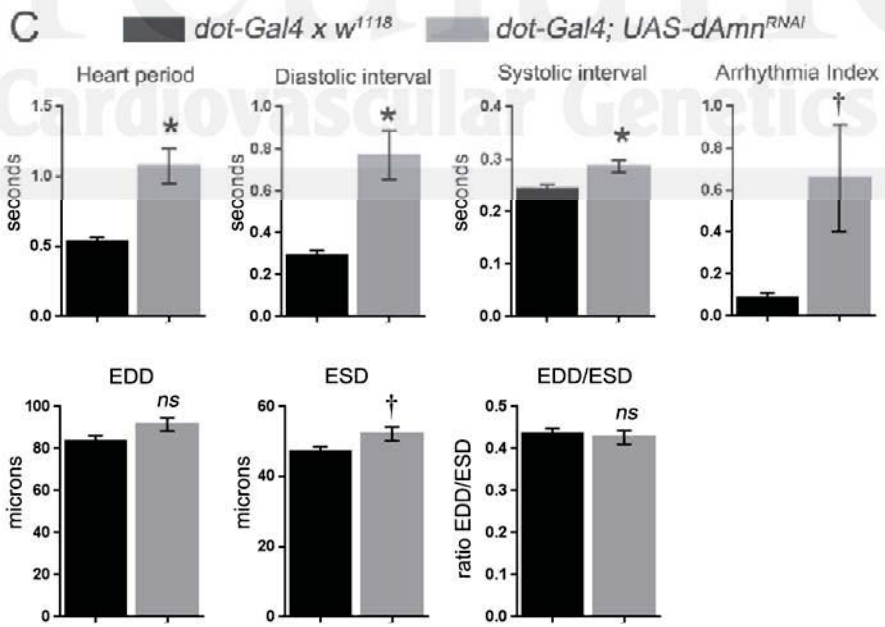

Cardiovascular Genetics

A

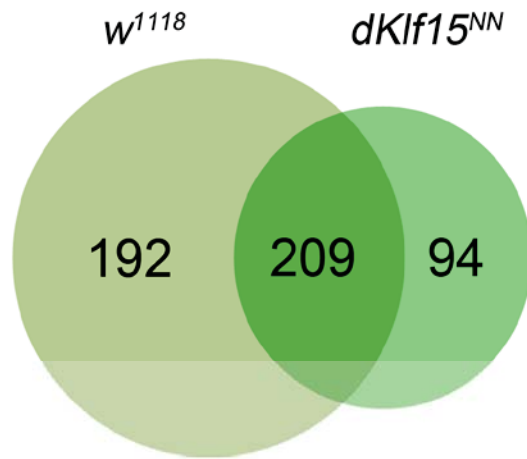

B

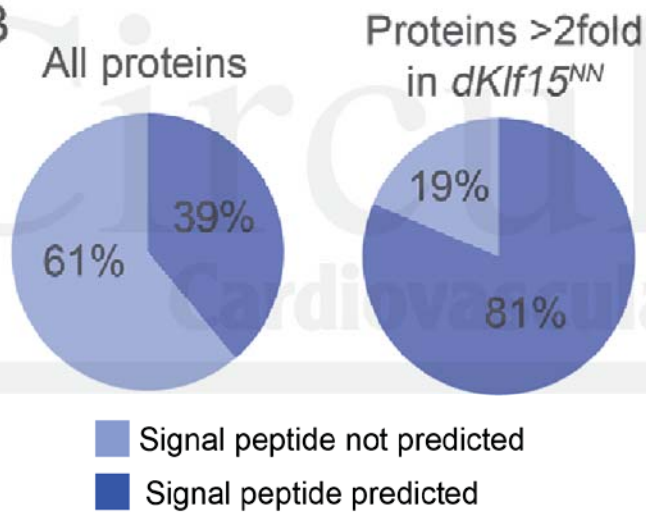

C

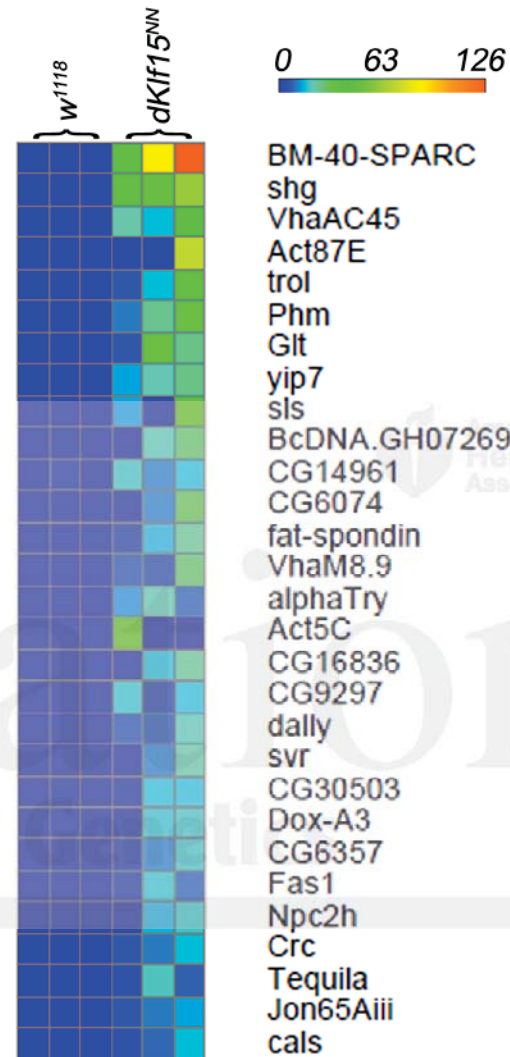

D

M R S L W L L L G L G L L A V S H V Q A S T E F S E D L L D E D L D L S D I D E N E E E F L R L L E E K N K I K D I E R E N E I A T K  
L A E V Q H N L L N P V V E V D L C E T M S C G A G R I C Q M H D E K P K C V C I P E C P E E V D T R R L V C T N T N E T W P  
S D C S V Y Q Q R C W C D S G E P G C T N P D N A H M H I D Y Y G A C H E P R S C E G E D L K D F P R R M R D W L F N V M  
R D L A E R D E L T E H Y M Q M E L E A E T N N S R R W S N A A V W K W C D L D G D T D R S V S R H E L F P I R A P L V S L  
E H C I A P F L E S C D S N K D H R I T L V E W G A C L E L D P E D L K E R C D D V Q R A Q P H L L G

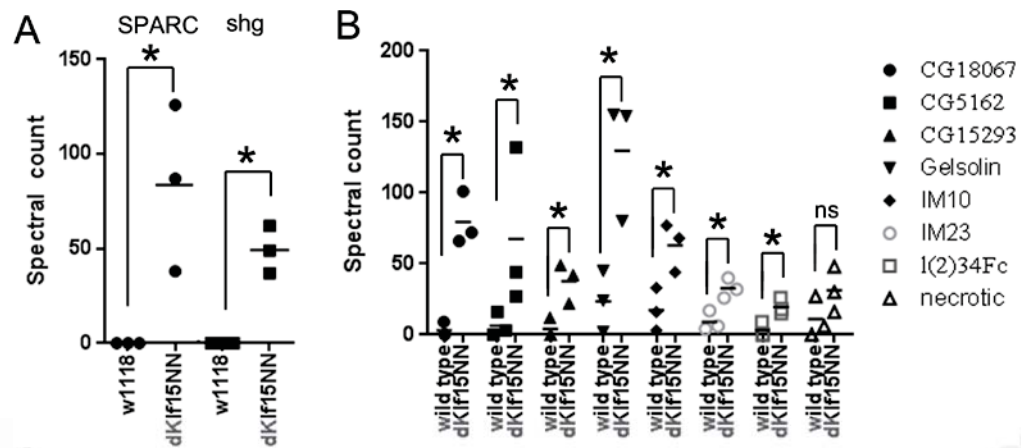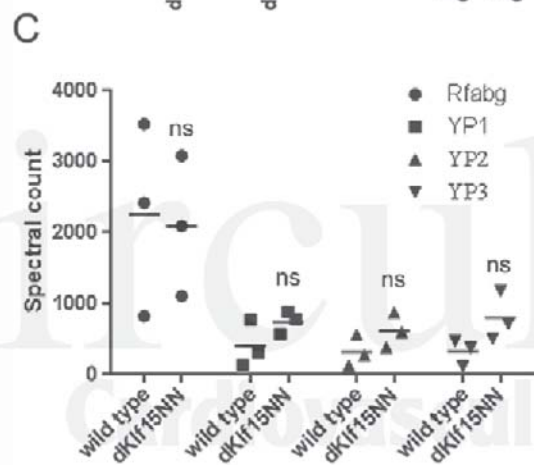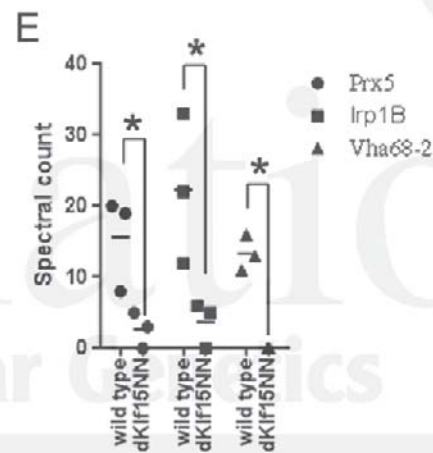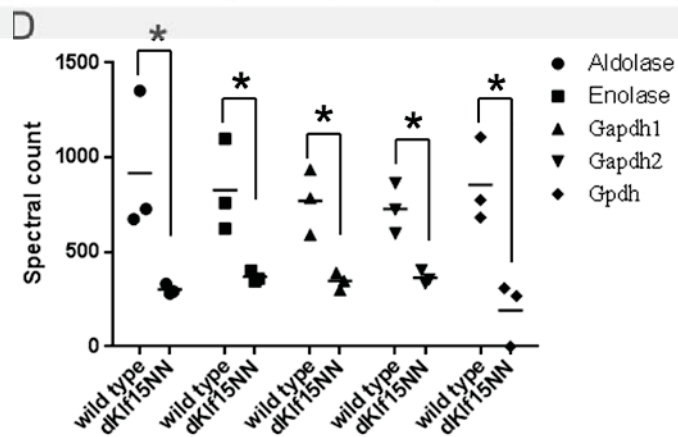

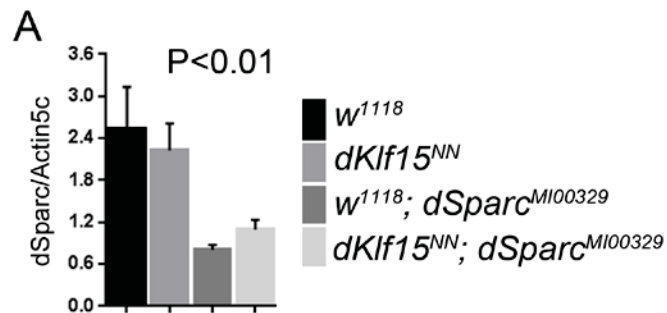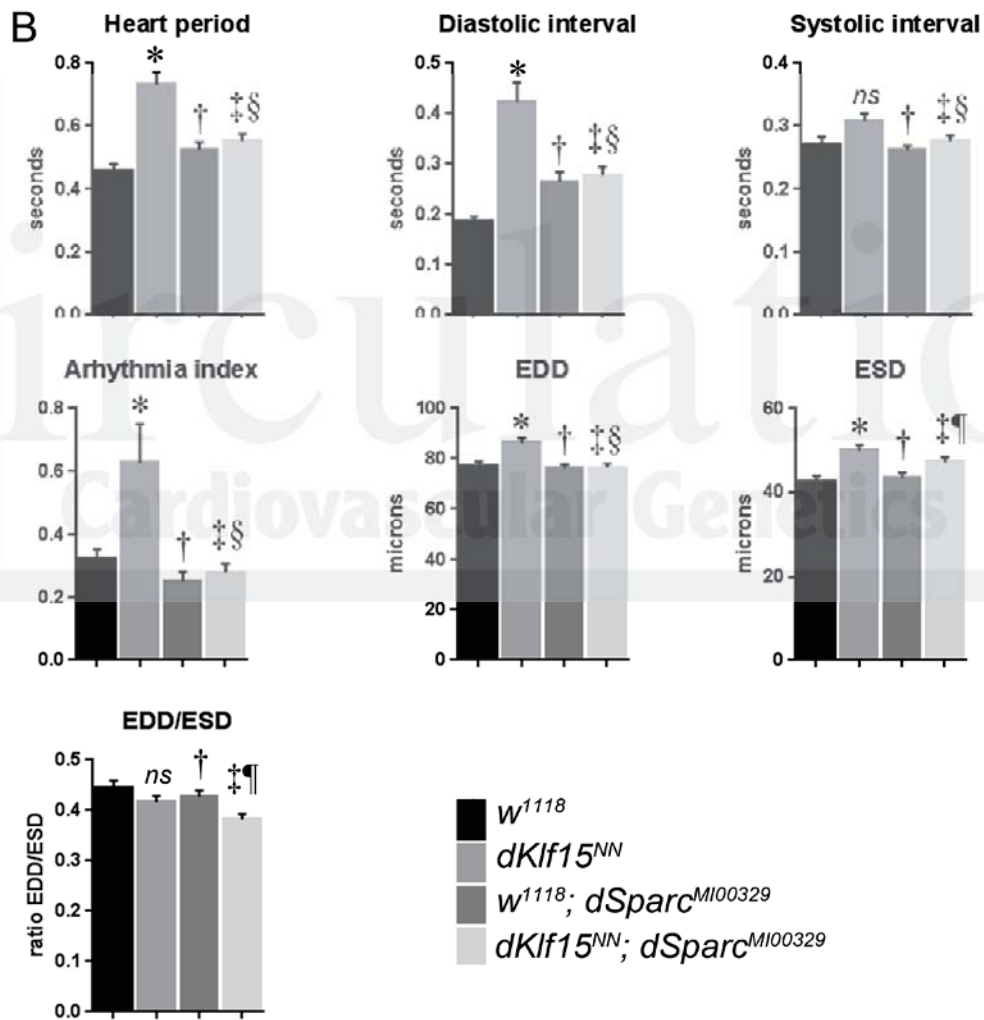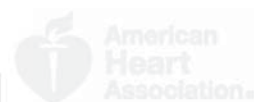

Cardiovascular Genetics
